# Supplementary material (part 1 of 2)
Source: ML conference proceedings conference paper supplement (https://openreview.net/forum?id=qiSE7datah)

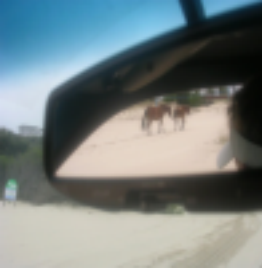

Source

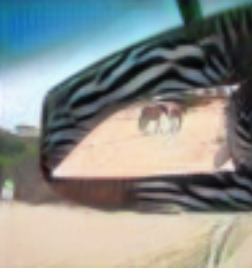

Baseline

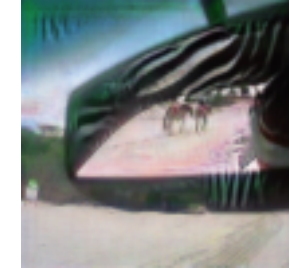

$P_{0.5}(w) \rightarrow Q_{12}(w, f)$

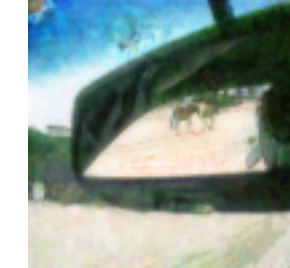

$P_{0.5}(w, f) \rightarrow Q_{12}(w, f)$

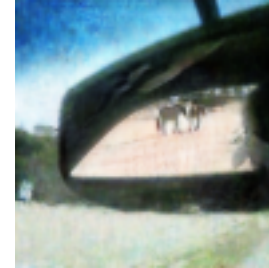

$Q_{12}(w, f) \rightarrow P_{0.5}(w, f)$

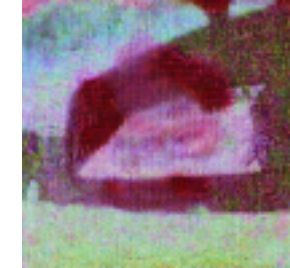

$P_{0.5}(w) \rightarrow Q_8(w, f)$

Supplement: supplementary_material [file attachment]

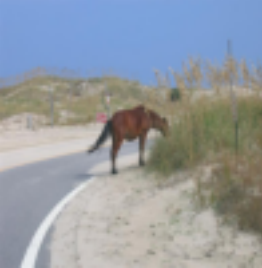

Source

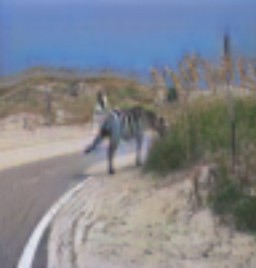

Baseline

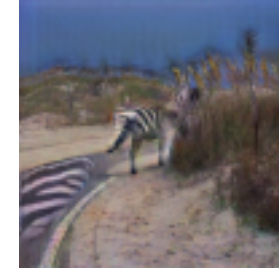

$P_{0.5}(w) \rightarrow Q_{12}(w, f)$

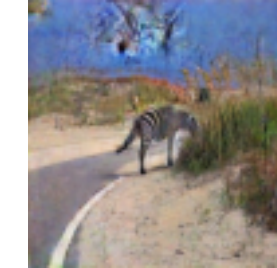

$P_{0.5}(w, f) \rightarrow Q_{12}(w, f)$

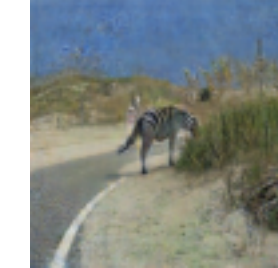

$Q_{12}(w, f) \rightarrow P_{0.5}(w, f)$

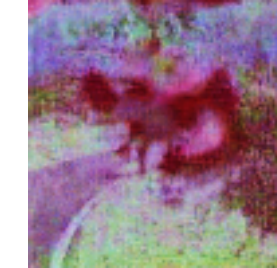

$P_{0.5}(w) \rightarrow Q_8(w, f)$

Supplement: supplementary_material [file attachment]

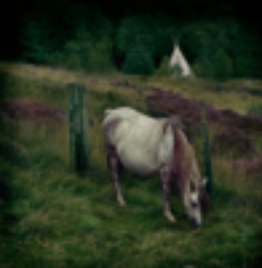

Source

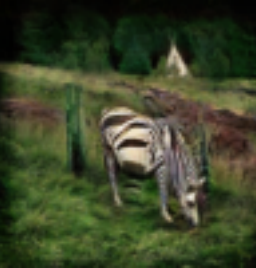

Baseline

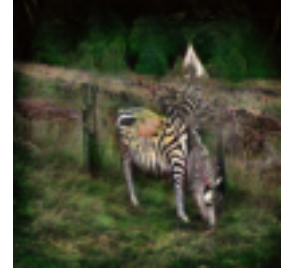

$P_{0.5}(w) \rightarrow Q_{12}(w, f)$

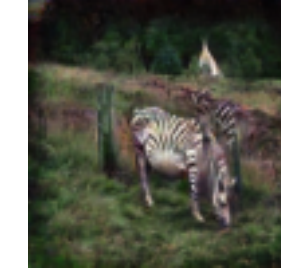

$P_{0.5}(w, f) \rightarrow Q_{12}(w, f)$

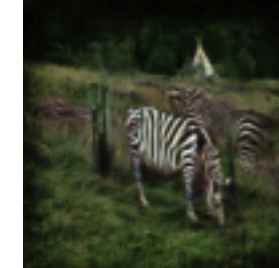

$Q_{12}(w, f) \rightarrow P_{0.5}(w, f)$

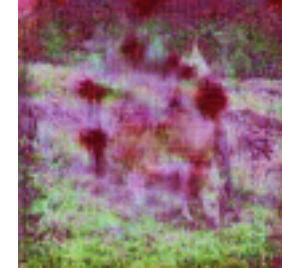

$P_{0.5}(w) \rightarrow Q_8(w, f)$

Supplement: supplementary_material [file attachment]

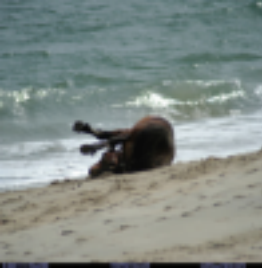

Source

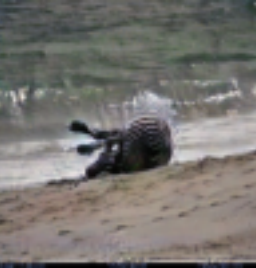

Baseline

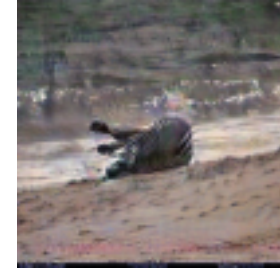

$P_{0.5}(w) \rightarrow Q_{12}(w, f)$

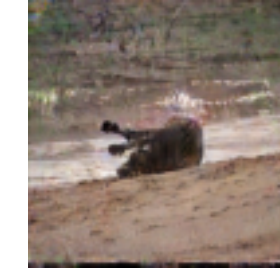

$P_{0.5}(w, f) \rightarrow Q_{12}(w, f)$

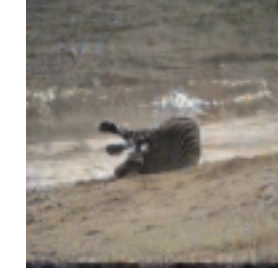

$Q_{12}(w, f) \rightarrow P_{0.5}(w, f)$

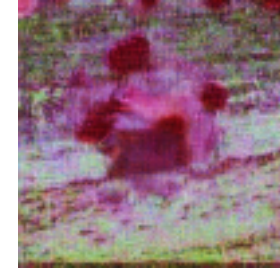

$P_{0.5}(w) \rightarrow Q_8(w, f)$

Supplement: supplementary_material [file attachment]

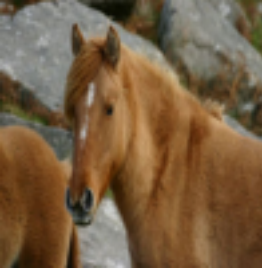

Source

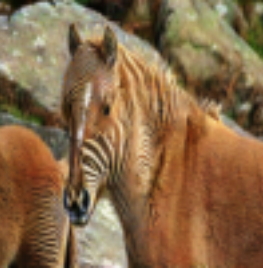

Baseline

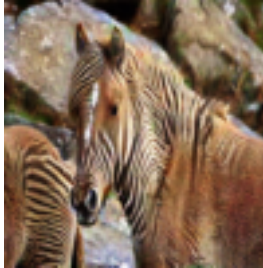

$P_{0.5}(w) \rightarrow Q_{12}(w, f)$

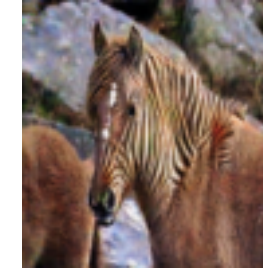

$P_{0.5}(w, f) \rightarrow Q_{12}(w, f)$

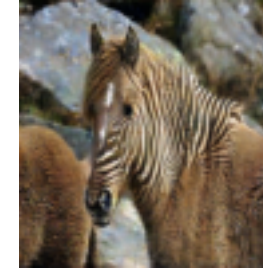

$Q_{12}(w, f) \rightarrow P_{0.5}(w, f)$

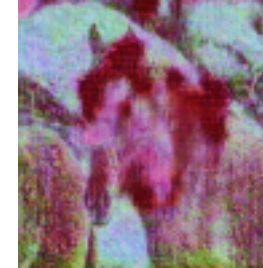

$P_{0.5}(w) \rightarrow Q_8(w, f)$

Supplement: supplementary_material [file attachment]

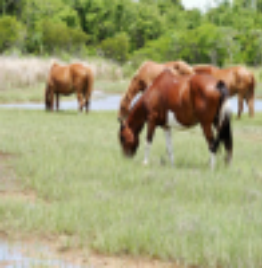

Source

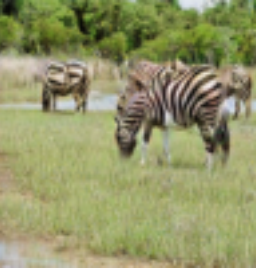

Baseline

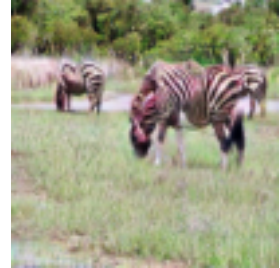

$P_{0.5}(w) \rightarrow Q_{12}(w, f)$

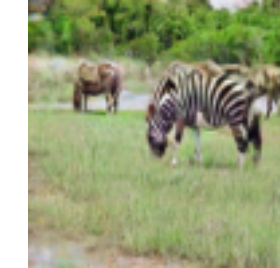

$P_{0.5}(w, f) \rightarrow Q_{12}(w, f)$

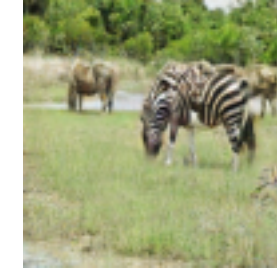

$Q_{12}(w, f) \rightarrow P_{0.5}(w, f)$

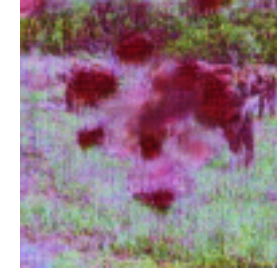

$P_{0.5}(w) \rightarrow Q_8(w, f)$

Supplement: supplementary_material [file attachment]

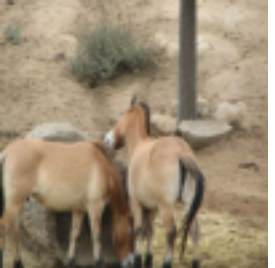

Source

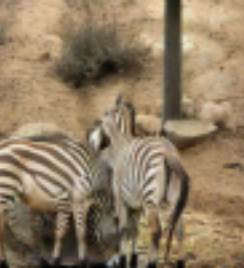

Baseline

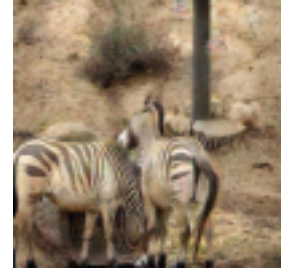

$P_{0.5}(w) \rightarrow Q_{12}(w, f)$

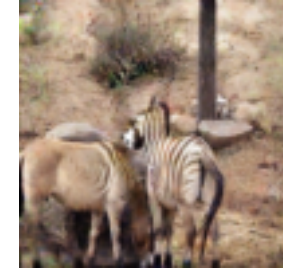

$P_{0.5}(w, f) \rightarrow Q_{12}(w, f)$

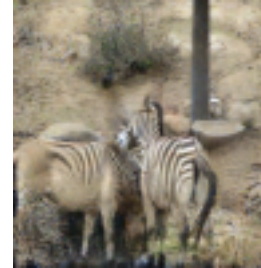

$Q_{12}(w, f) \rightarrow P_{0.5}(w, f)$

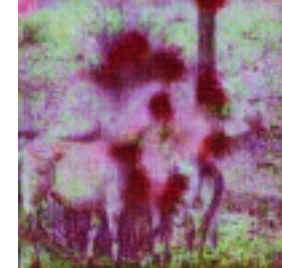

$P_{0.5}(w) \rightarrow Q_8(w, f)$

Supplement: supplementary_material [file attachment]

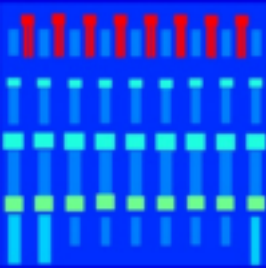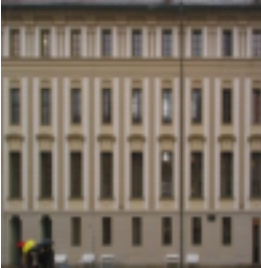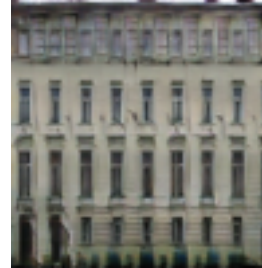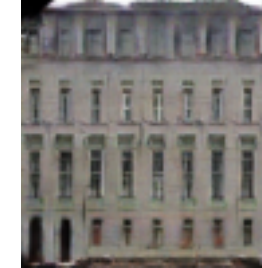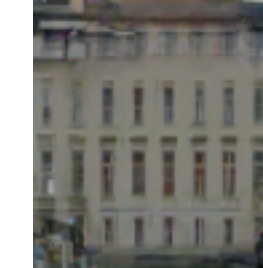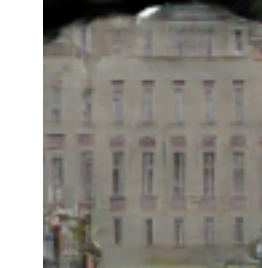

Input

Groundtruth

Baseline

$P_{0.5}(w) \rightarrow Q_8(w, f)$

$Q_8(w, f) \rightarrow P_{0.5}(w, f)$

$P_{0.5}(w, f) \rightarrow Q_8(w, f)$

Supplement: supplementary_material [file attachment]

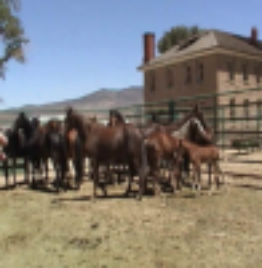

Source

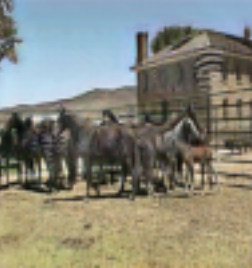

Baseline

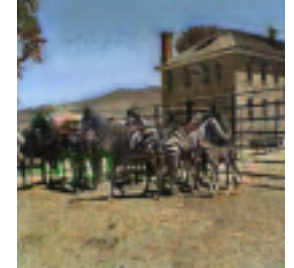

$P_{0.5}(w) \rightarrow Q_{12}(w, f)$

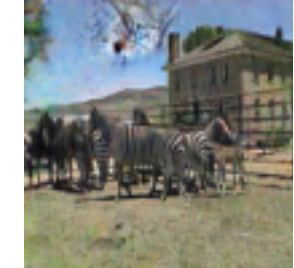

$P_{0.5}(w, f) \rightarrow Q_{12}(w, f)$

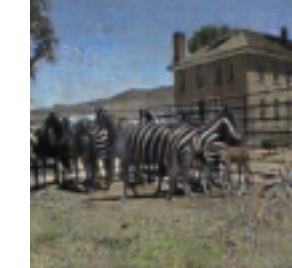

$Q_{12}(w, f) \rightarrow P_{0.5}(w, f)$

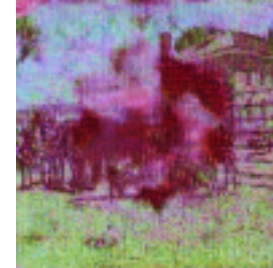

$P_{0.5}(w) \rightarrow Q_8(w, f)$

Supplement: supplementary_material [file attachment]

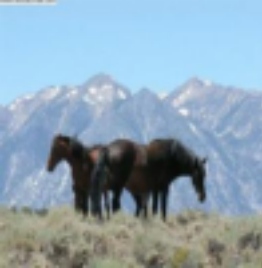

Source

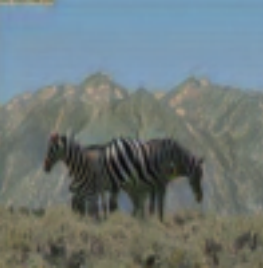

Baseline

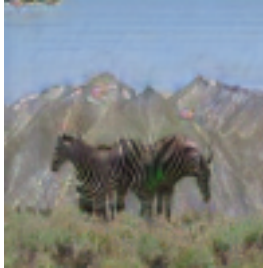

$P_{0.5}(w) \rightarrow Q_{12}(w, f)$

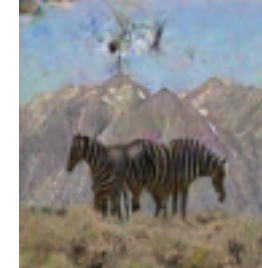

$P_{0.5}(w, f) \rightarrow Q_{12}(w, f)$

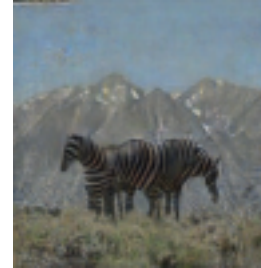

$Q_{12}(w, f) \rightarrow P_{0.5}(w, f)$

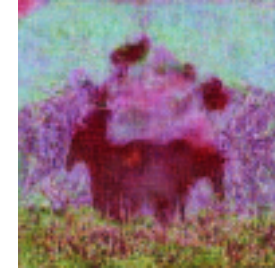

$P_{0.5}(w) \rightarrow Q_8(w, f)$

Supplement: supplementary_material [file attachment]

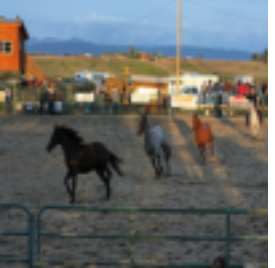

Source

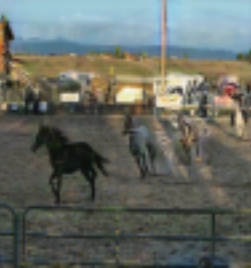

Baseline

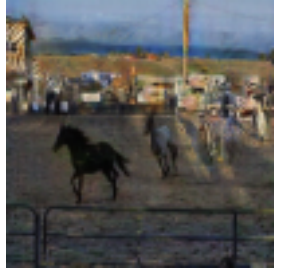

$P_{0.5}(w) \rightarrow Q_{12}(w, f)$

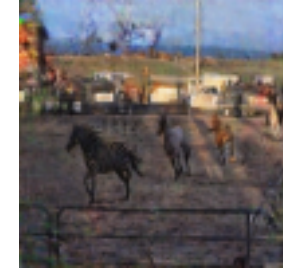

$P_{0.5}(w, f) \rightarrow Q_{12}(w, f)$

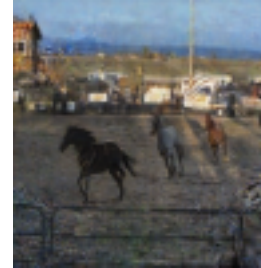

$Q_{12}(w, f) \rightarrow P_{0.5}(w, f)$

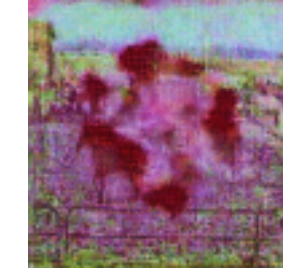

$P_{0.5}(w) \rightarrow Q_8(w, f)$

Supplement: supplementary_material [file attachment]

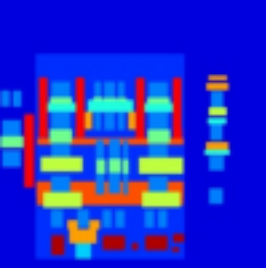

Input

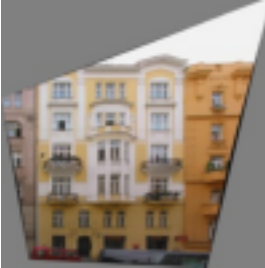

Groundtruth

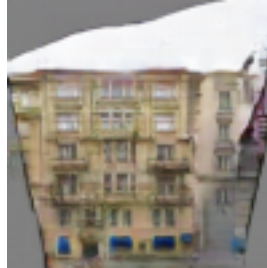

Baseline

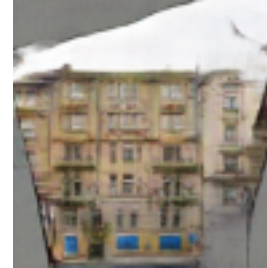

$P_{0.5}(w) \rightarrow Q_8(w, f)$

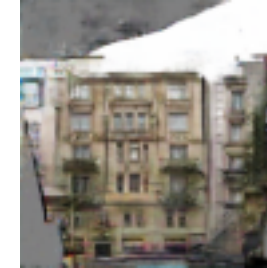

$Q_8(w, f) \rightarrow P_{0.5}(w, f)$

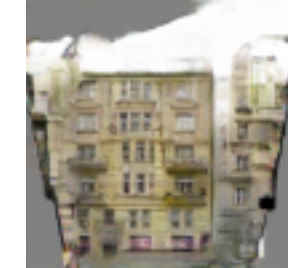

$P_{0.5}(w, f) \rightarrow Q_8(w, f)$

Supplement: supplementary_material [file attachment]

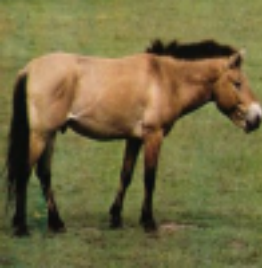

Source

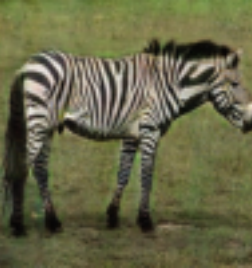

Baseline

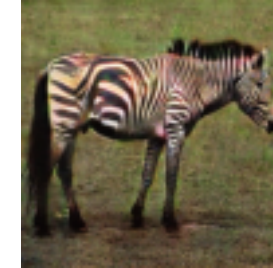

$P_{0.5}(w) \rightarrow Q_{12}(w, f)$

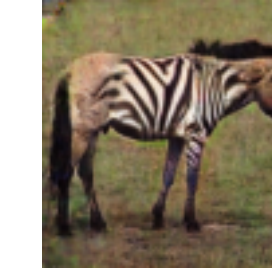

$P_{0.5}(w, f) \rightarrow Q_{12}(w, f)$

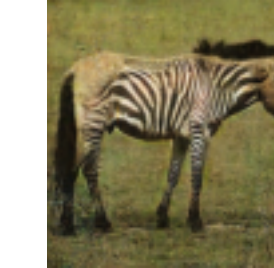

$Q_{12}(w, f) \rightarrow P_{0.5}(w, f)$

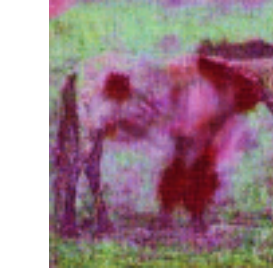

$P_{0.5}(w) \rightarrow Q_8(w, f)$

Supplement: supplementary_material [file attachment]

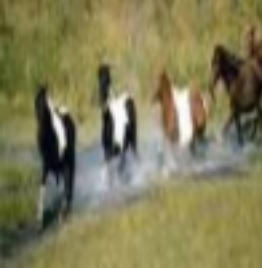

Source

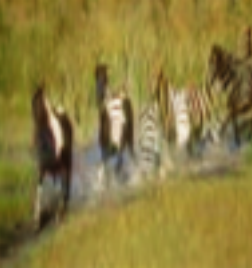

Baseline

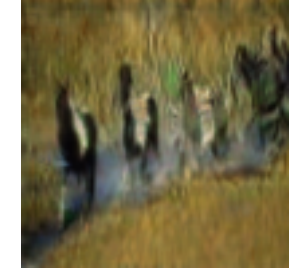

$P_{0.5}(w) \rightarrow Q_{12}(w, f)$

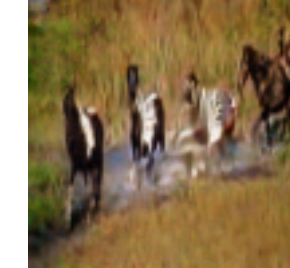

$P_{0.5}(w, f) \rightarrow Q_{12}(w, f)$

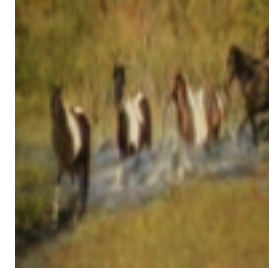

$Q_{12}(w, f) \rightarrow P_{0.5}(w, f)$

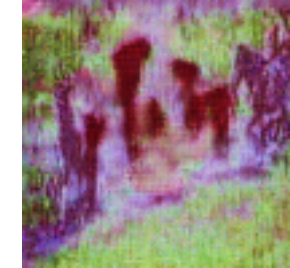

$P_{0.5}(w) \rightarrow Q_8(w, f)$

Supplement: supplementary_material [file attachment]

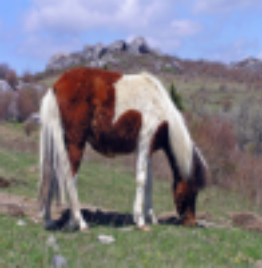

Source

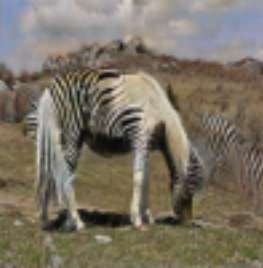

Baseline

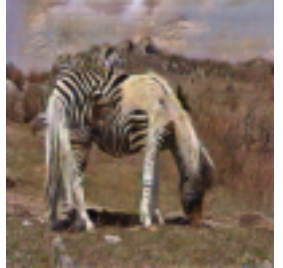

$P_{0.5}(w) \rightarrow Q_{12}(w, f)$

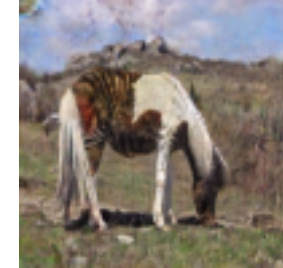

$P_{0.5}(w, f) \rightarrow Q_{12}(w, f)$

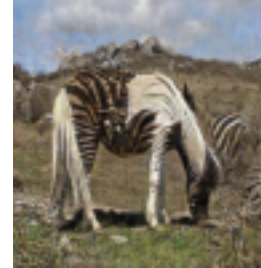

$Q_{12}(w, f) \rightarrow P_{0.5}(w, f)$

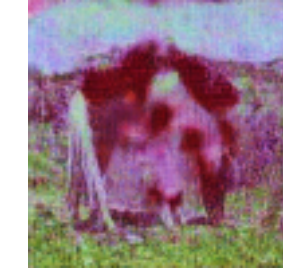

$P_{0.5}(w) \rightarrow Q_8(w, f)$

Supplement: supplementary_material [file attachment]

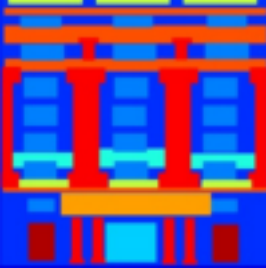

Input

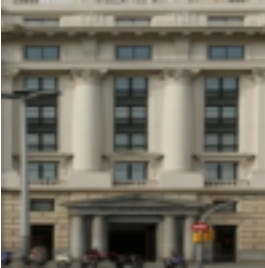

Groundtruth

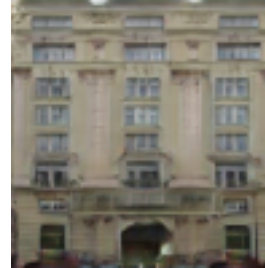

Baseline

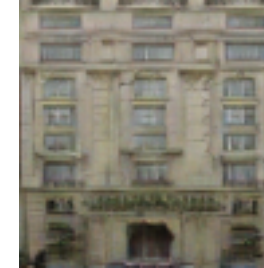

$P_{0.5}(w) \rightarrow Q_8(w, f)$

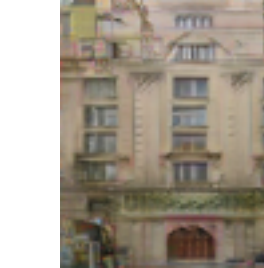

$Q_8(w, f) \rightarrow P_{0.5}(w, f)$

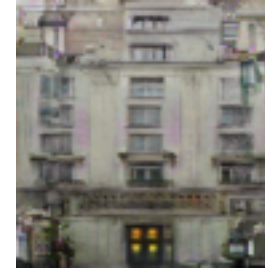

$P_{0.5}(w, f) \rightarrow Q_8(w, f)$

Supplement: supplementary_material [file attachment]

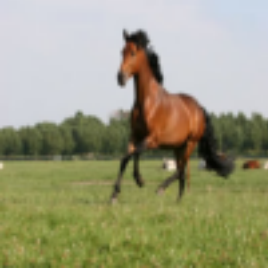

Source

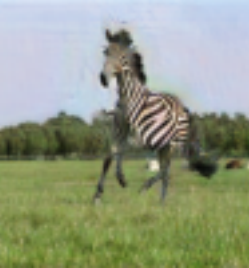

Baseline

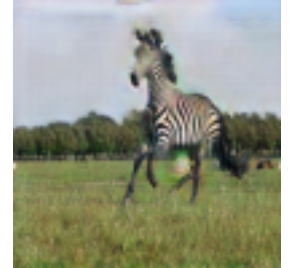

$P_{0.5}(w) \rightarrow Q_{12}(w, f)$

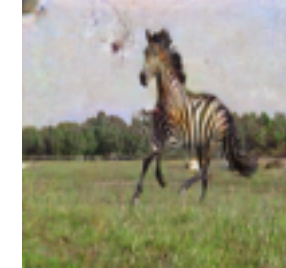

$P_{0.5}(w, f) \rightarrow Q_{12}(w, f)$

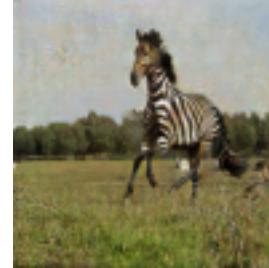

$Q_{12}(w, f) \rightarrow P_{0.5}(w, f)$

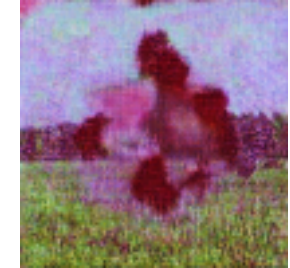

$P_{0.5}(w) \rightarrow Q_8(w, f)$

Supplement: supplementary_material [file attachment]

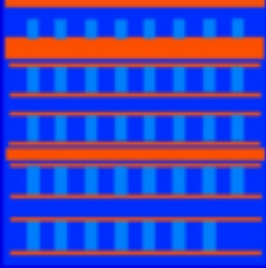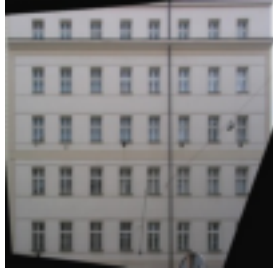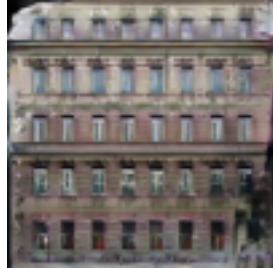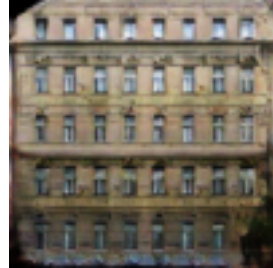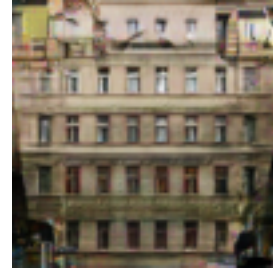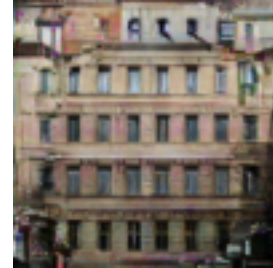

Input

Groundtruth

Baseline

$P_{0.5}(w) \rightarrow Q_8(w, f)$

$Q_8(w, f) \rightarrow P_{0.5}(w, f)$

$P_{0.5}(w, f) \rightarrow Q_8(w, f)$

Supplement: supplementary_material [file attachment]

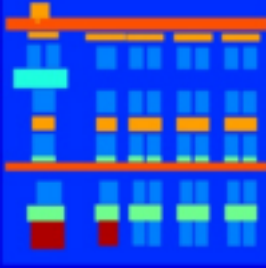

Input

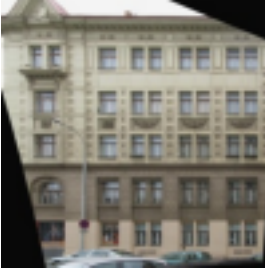

Groundtruth

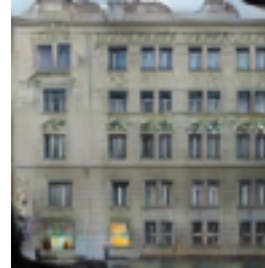

Baseline

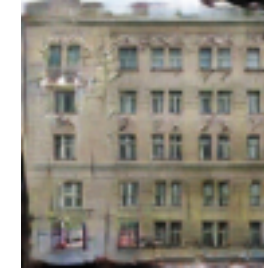

$P_{0.5}(w) \rightarrow Q_8(w, f)$

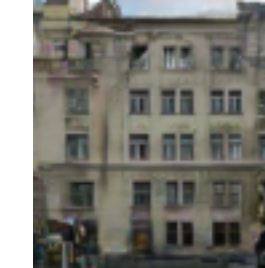

$Q_8(w, f) \rightarrow P_{0.5}(w, f)$

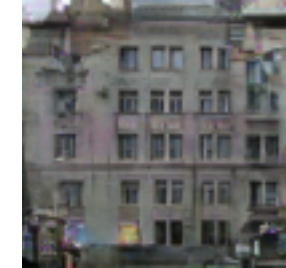

$P_{0.5}(w, f) \rightarrow Q_8(w, f)$

Supplement: supplementary_material [file attachment]

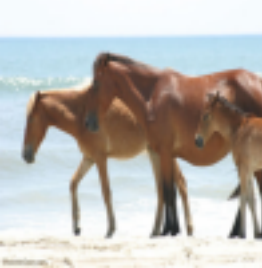

Source

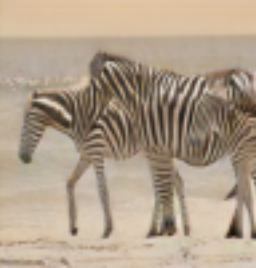

Baseline

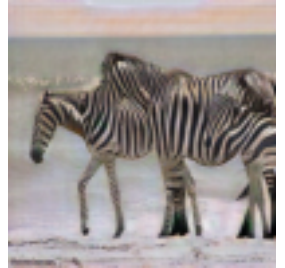

$P_{0.5}(w) \rightarrow Q_{12}(w, f)$

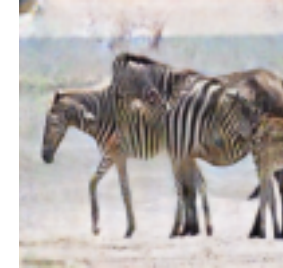

$P_{0.5}(w, f) \rightarrow Q_{12}(w, f)$

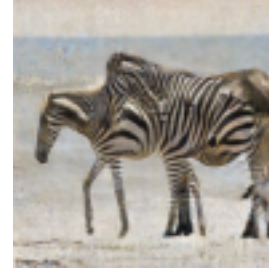

$Q_{12}(w, f) \rightarrow P_{0.5}(w, f)$

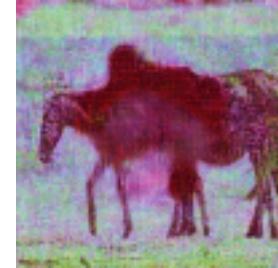

$P_{0.5}(w) \rightarrow Q_8(w, f)$

Supplement: supplementary_material [file attachment]

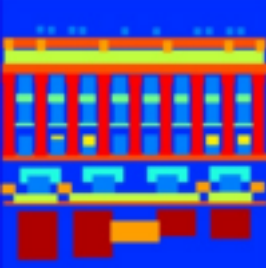

Input

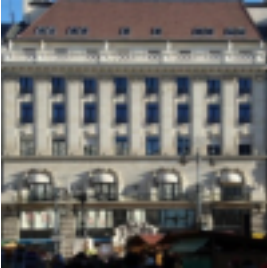

Groundtruth

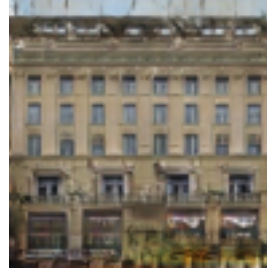

Baseline

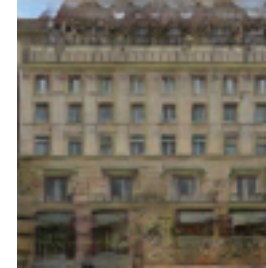

$P_{0.5}(w) \rightarrow Q_8(w, f)$

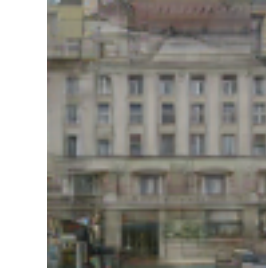

$Q_8(w, f) \rightarrow P_{0.5}(w, f)$

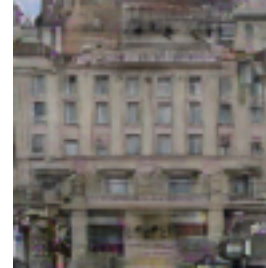

$P_{0.5}(w, f) \rightarrow Q_8(w, f)$

Supplement: supplementary_material [file attachment]

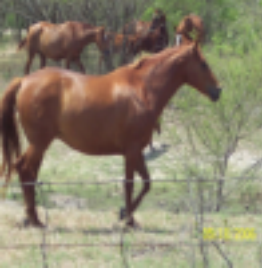

Source

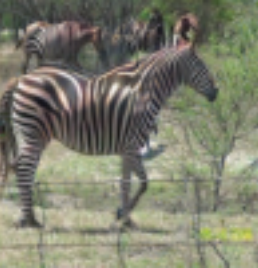

Baseline

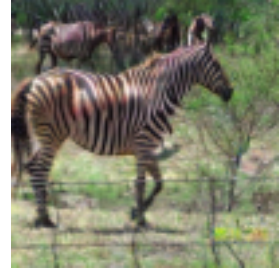

$P_{0.5}(w) \rightarrow Q_{12}(w, f)$

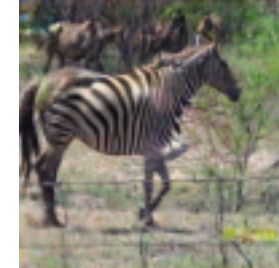

$P_{0.5}(w, f) \rightarrow Q_{12}(w, f)$

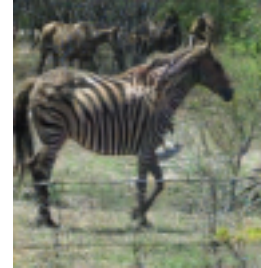

$Q_{12}(w, f) \rightarrow P_{0.5}(w, f)$

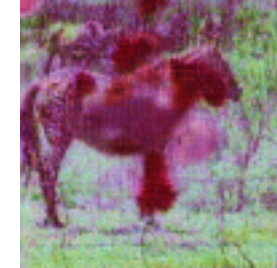

$P_{0.5}(w) \rightarrow Q_8(w, f)$

Supplement: supplementary_material [file attachment]

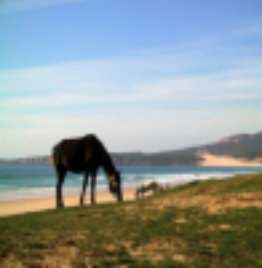

Source

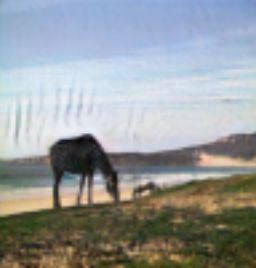

Baseline

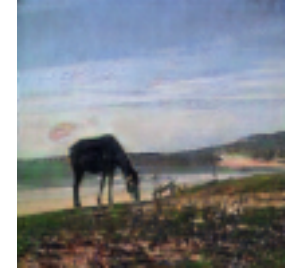

$P_{0.5}(w) \rightarrow Q_{12}(w, f)$

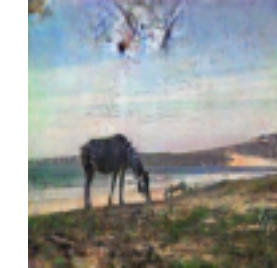

$P_{0.5}(w, f) \rightarrow Q_{12}(w, f)$

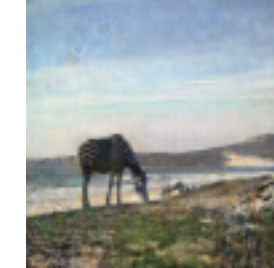

$Q_{12}(w, f) \rightarrow P_{0.5}(w, f)$

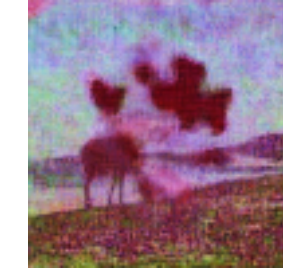

$P_{0.5}(w) \rightarrow Q_8(w, f)$

Supplement: supplementary_material [file attachment]

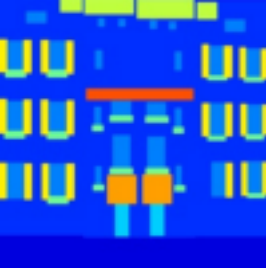

Input

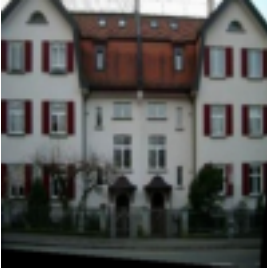

Groundtruth

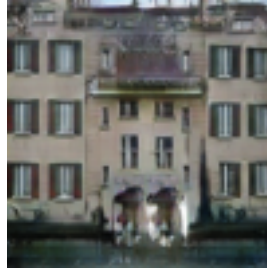

Baseline

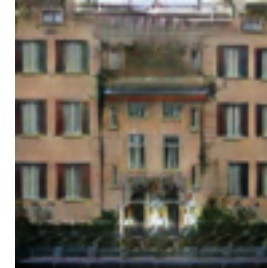

$P_{0.5}(w) \rightarrow Q_8(w, f)$

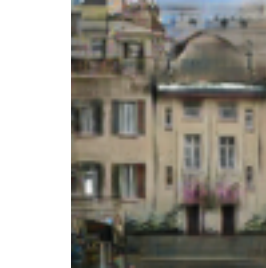

$Q_8(w, f) \rightarrow P_{0.5}(w, f)$

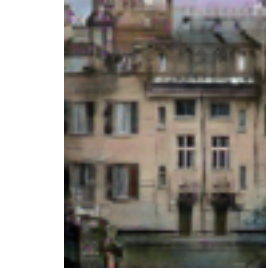

$P_{0.5}(w, f) \rightarrow Q_8(w, f)$

Supplement: supplementary_material [file attachment]

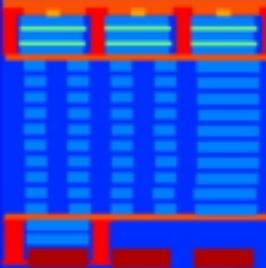

Input

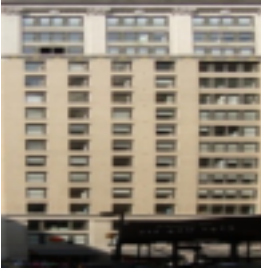

Groundtruth

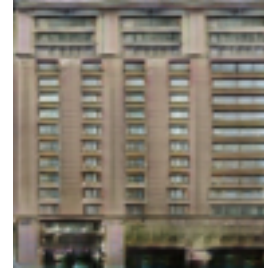

Baseline

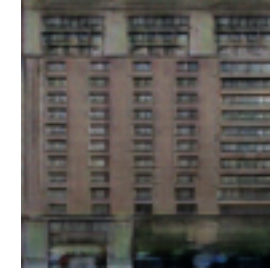

$P_{0.5}(w) \rightarrow Q_8(w, f)$

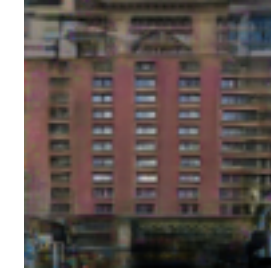

$Q_8(w, f) \rightarrow P_{0.5}(w, f)$

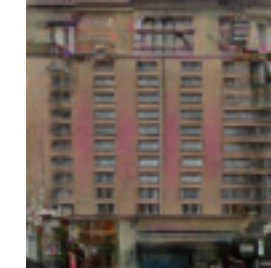

$P_{0.5}(w, f) \rightarrow Q_8(w, f)$

Supplement: supplementary_material [file attachment]

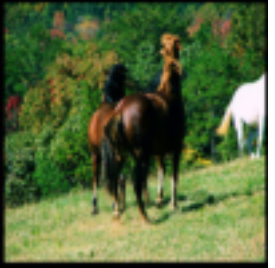

Source

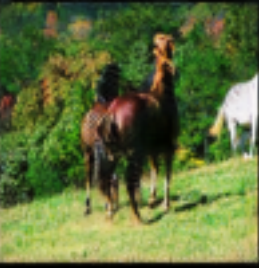

Baseline

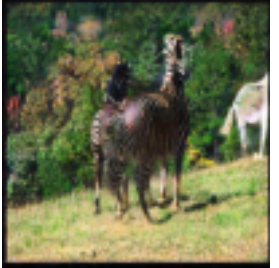

$P_{0.5}(w) \rightarrow Q_{12}(w, f)$

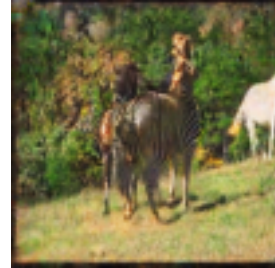

$P_{0.5}(w, f) \rightarrow Q_{12}(w, f)$

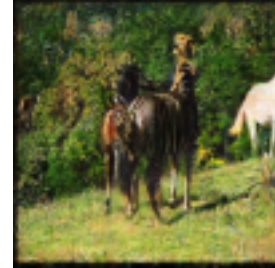

$Q_{12}(w, f) \rightarrow P_{0.5}(w, f)$

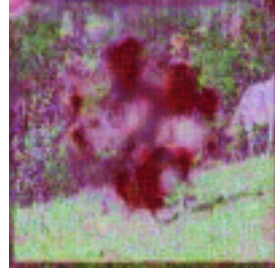

$P_{0.5}(w) \rightarrow Q_8(w, f)$

Supplement: supplementary_material [file attachment]

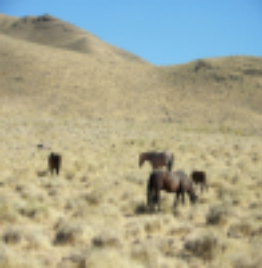

Source

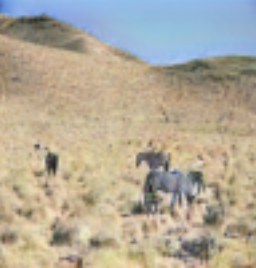

Baseline

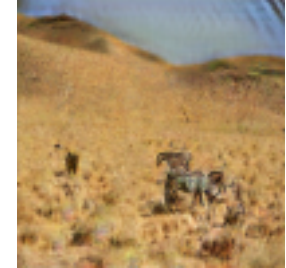

$P_{0.5}(w) \rightarrow Q_{12}(w, f)$

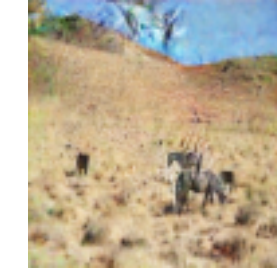

$P_{0.5}(w, f) \rightarrow Q_{12}(w, f)$

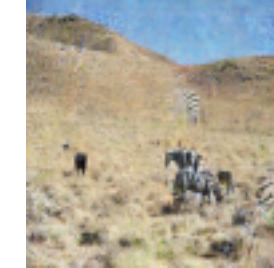

$Q_{12}(w, f) \rightarrow P_{0.5}(w, f)$

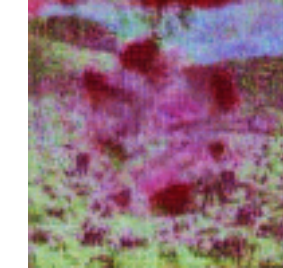

$P_{0.5}(w) \rightarrow Q_8(w, f)$

Supplement: supplementary_material [file attachment]

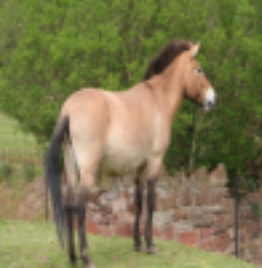

Source

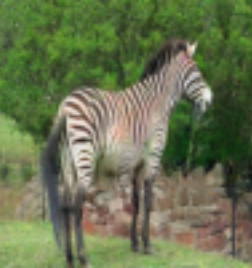

Baseline

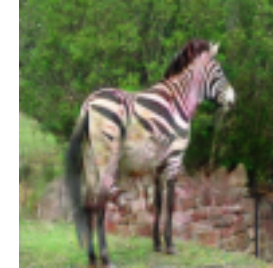

$P_{0.5}(w) \rightarrow Q_{12}(w, f)$

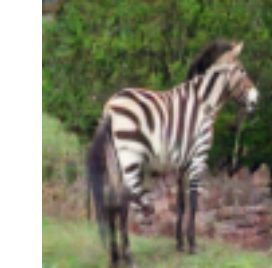

$P_{0.5}(w, f) \rightarrow Q_{12}(w, f)$

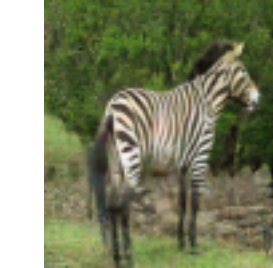

$Q_{12}(w, f) \rightarrow P_{0.5}(w, f)$

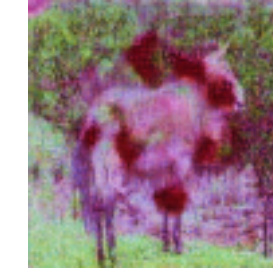

$P_{0.5}(w) \rightarrow Q_8(w, f)$

Supplement: supplementary_material [file attachment]

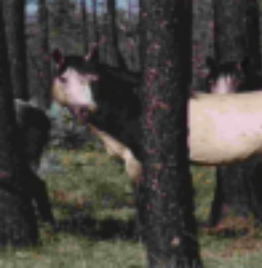

Source

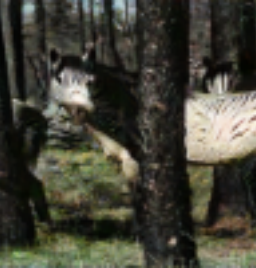

Baseline

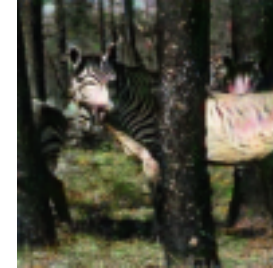

$P_{0.5}(w) \rightarrow Q_{12}(w, f)$

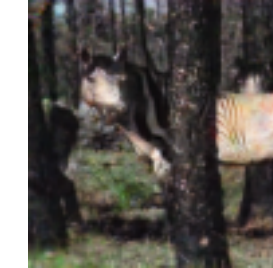

$P_{0.5}(w, f) \rightarrow Q_{12}(w, f)$

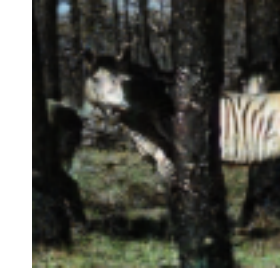

$Q_{12}(w, f) \rightarrow P_{0.5}(w, f)$

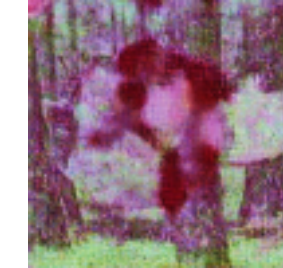

$P_{0.5}(w) \rightarrow Q_8(w, f)$

Supplement: supplementary_material [file attachment]

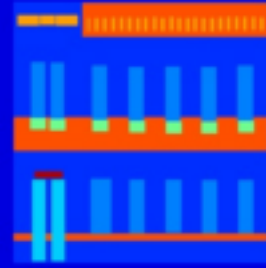

Input

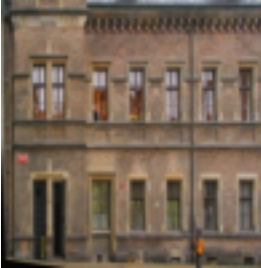

Groundtruth

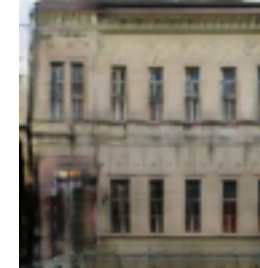

Baseline

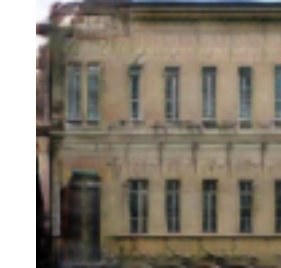

$P_{0.5}(w) \rightarrow Q_8(w, f)$

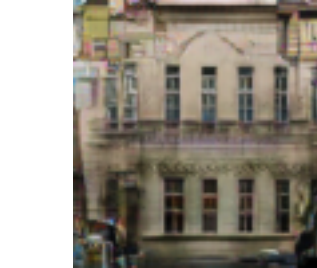

$Q_8(w, f) \rightarrow P_{0.5}(w, f)$

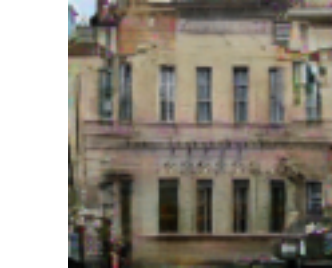

$P_{0.5}(w, f) \rightarrow Q_8(w, f)$

Supplement: supplementary_material [file attachment]

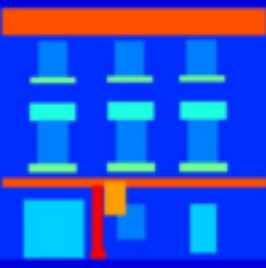

Input

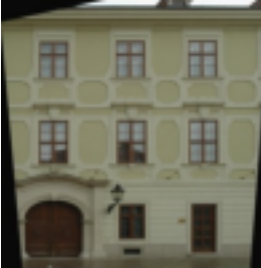

Groundtruth

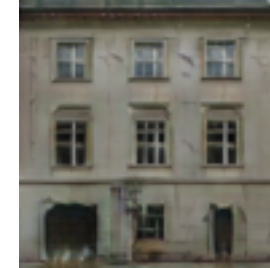

Baseline

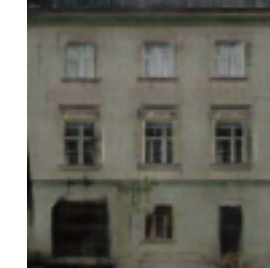

$P_{0.5}(w) \rightarrow Q_8(w, f)$

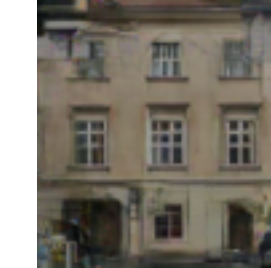

$Q_8(w, f) \rightarrow P_{0.5}(w, f)$

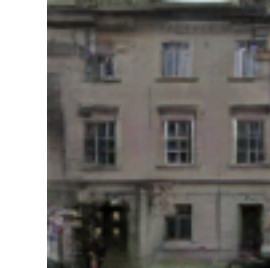

$P_{0.5}(w, f) \rightarrow Q_8(w, f)$

Supplement: supplementary_material [file attachment]

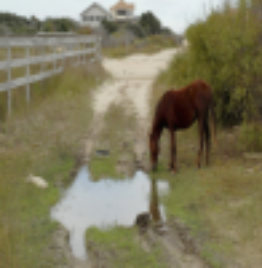

Source

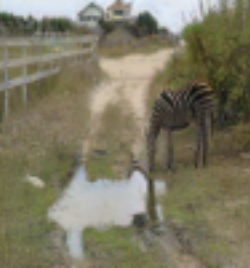

Baseline

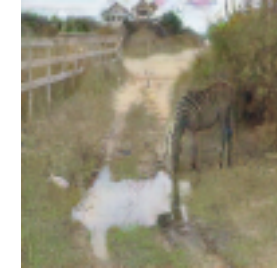

$P_{0.5}(w) \rightarrow Q_{12}(w, f)$

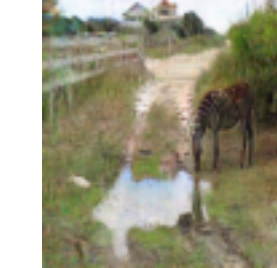

$P_{0.5}(w, f) \rightarrow Q_{12}(w, f)$

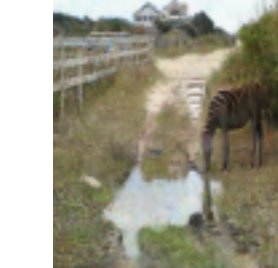

$Q_{12}(w, f) \rightarrow P_{0.5}(w, f)$

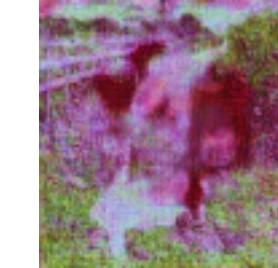

$P_{0.5}(w) \rightarrow Q_8(w, f)$

Supplement: supplementary_material [file attachment]

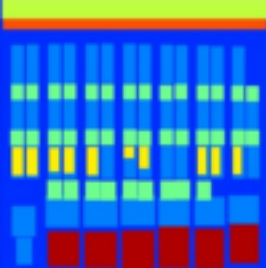

Input

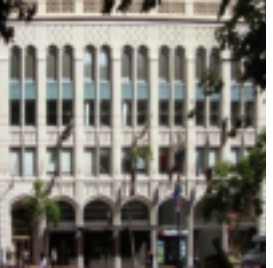

Groundtruth

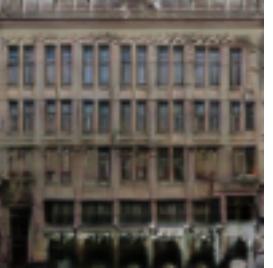

Baseline

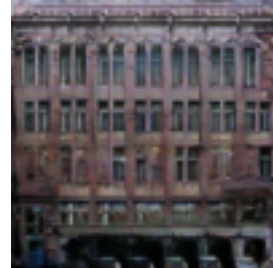

$P_{0.5}(w) \rightarrow Q_8(w, f)$

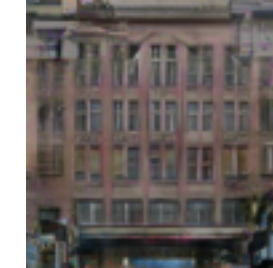

$Q_8(w, f) \rightarrow P_{0.5}(w, f)$

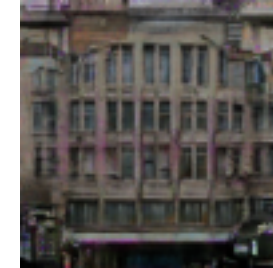

$P_{0.5}(w, f) \rightarrow Q_8(w, f)$

Supplement: supplementary_material [file attachment]

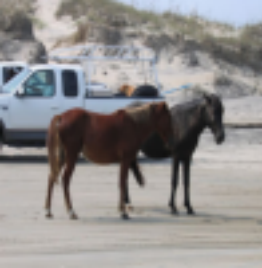

Source

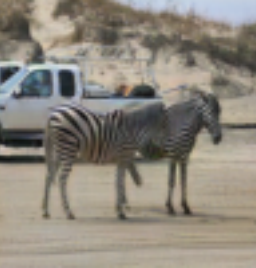

Baseline

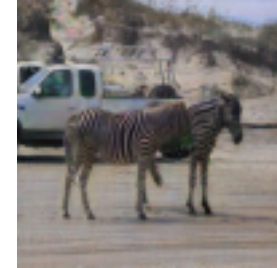

$P_{0.5}(w) \rightarrow Q_{12}(w, f)$

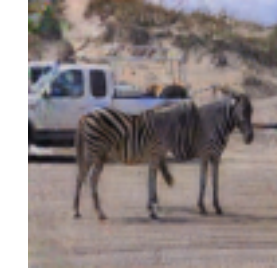

$P_{0.5}(w, f) \rightarrow Q_{12}(w, f)$

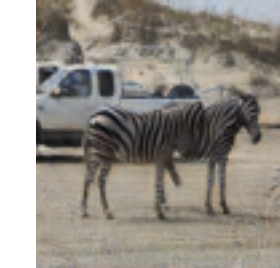

$Q_{12}(w, f) \rightarrow P_{0.5}(w, f)$

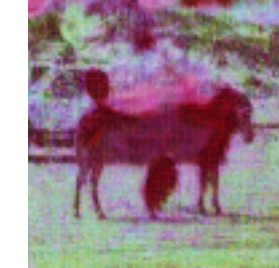

$P_{0.5}(w) \rightarrow Q_8(w, f)$

Supplement: supplementary_material [file attachment]

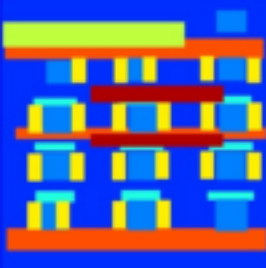

Input

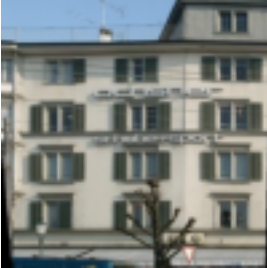

Groundtruth

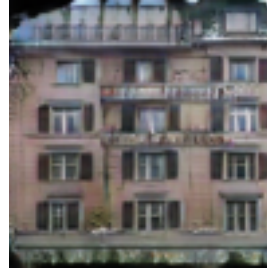

Baseline

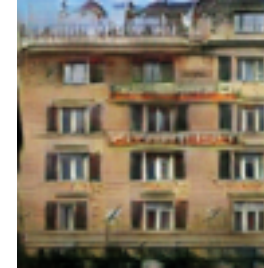

$P_{0.5}(w) \rightarrow Q_8(w, f)$

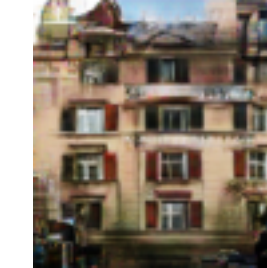

$Q_8(w, f) \rightarrow P_{0.5}(w, f)$

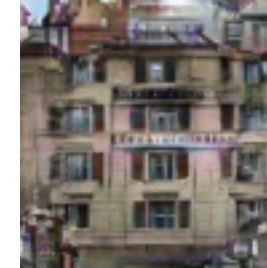

$P_{0.5}(w, f) \rightarrow Q_8(w, f)$

Supplement: supplementary_material [file attachment]

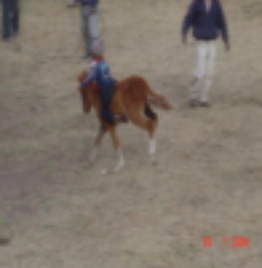

Source

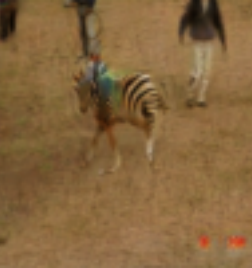

Baseline

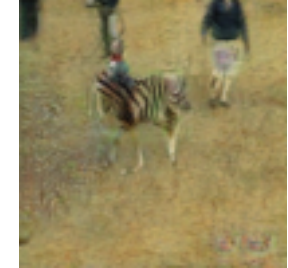

$P_{0.5}(w) \rightarrow Q_{12}(w, f)$

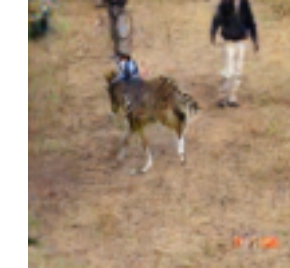

$P_{0.5}(w, f) \rightarrow Q_{12}(w, f)$

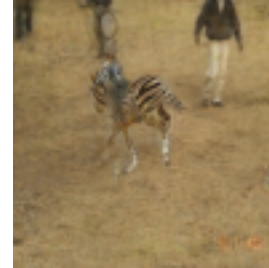

$Q_{12}(w, f) \rightarrow P_{0.5}(w, f)$

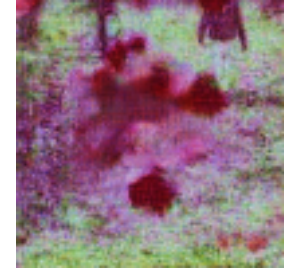

$P_{0.5}(w) \rightarrow Q_8(w, f)$

Supplement: supplementary_material [file attachment]

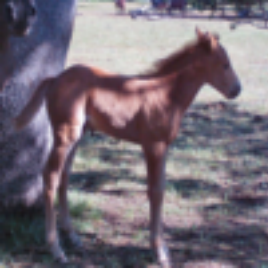

Source

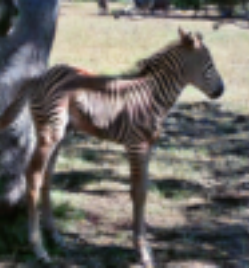

Baseline

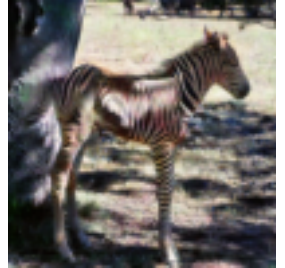

$P_{0.5}(w) \rightarrow Q_{12}(w, f)$

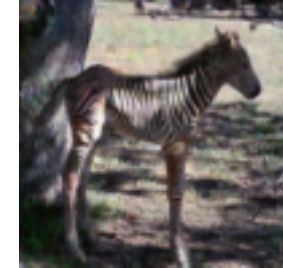

$P_{0.5}(w, f) \rightarrow Q_{12}(w, f)$

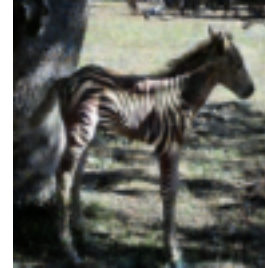

$Q_{12}(w, f) \rightarrow P_{0.5}(w, f)$

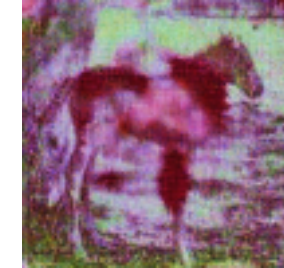

$P_{0.5}(w) \rightarrow Q_8(w, f)$

Supplement: supplementary_material [file attachment]

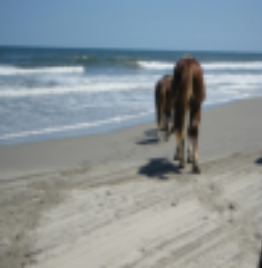

Source

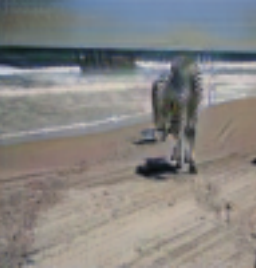

Baseline

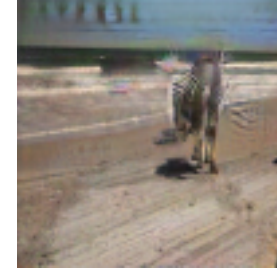

$P_{0.5}(w) \rightarrow Q_{12}(w, f)$

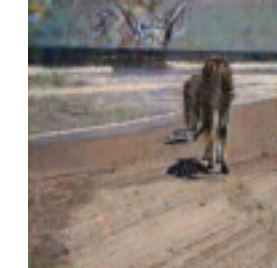

$P_{0.5}(w, f) \rightarrow Q_{12}(w, f)$

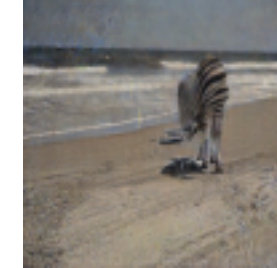

$Q_{12}(w, f) \rightarrow P_{0.5}(w, f)$

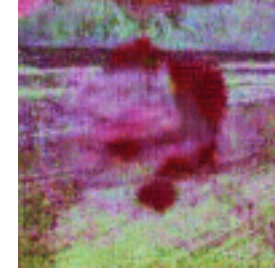

$P_{0.5}(w) \rightarrow Q_8(w, f)$

Supplement: supplementary_material [file attachment]

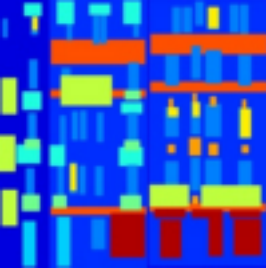

Input

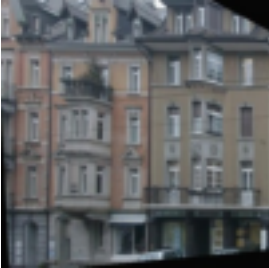

Groundtruth

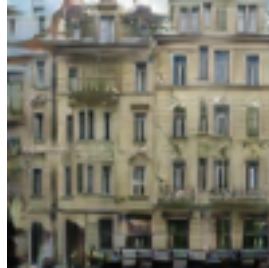

Baseline

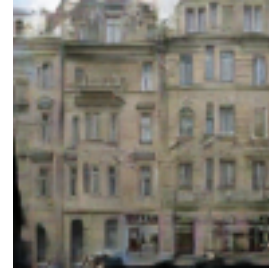

$P_{0.5}(w) \rightarrow Q_8(w, f)$

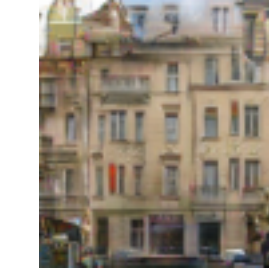

$Q_8(w, f) \rightarrow P_{0.5}(w, f)$

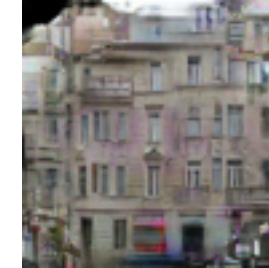

$P_{0.5}(w, f) \rightarrow Q_8(w, f)$

Supplement: supplementary_material [file attachment]

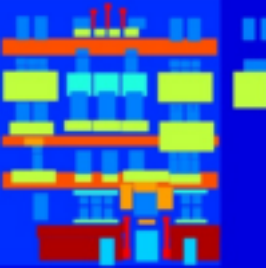

Input

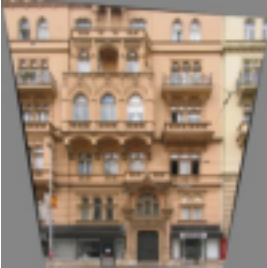

Groundtruth

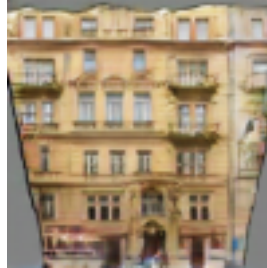

Baseline

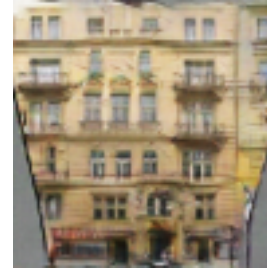

$P_{0.5}(w) \rightarrow Q_8(w, f)$

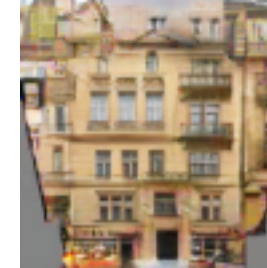

$Q_8(w, f) \rightarrow P_{0.5}(w, f)$

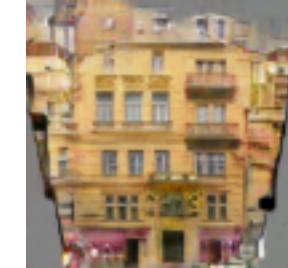

$P_{0.5}(w, f) \rightarrow Q_8(w, f)$

Supplement: supplementary_material [file attachment]

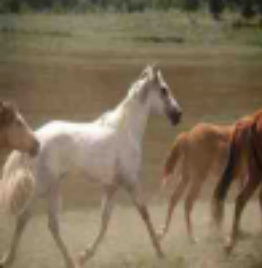

Source

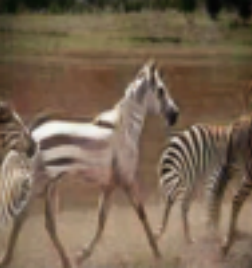

Baseline

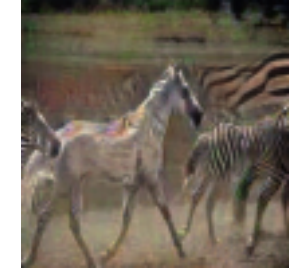

$P_{0.5}(w) \rightarrow Q_{12}(w, f)$

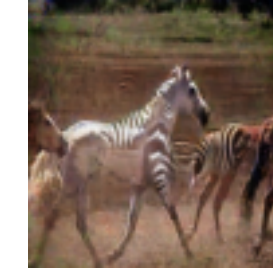

$P_{0.5}(w, f) \rightarrow Q_{12}(w, f)$

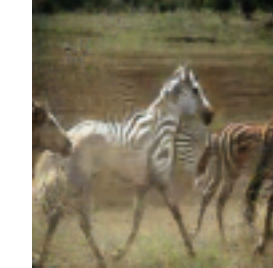

$Q_{12}(w, f) \rightarrow P_{0.5}(w, f)$

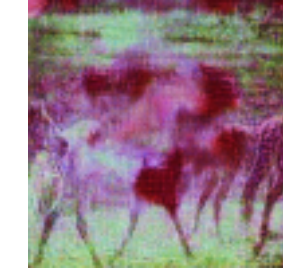

$P_{0.5}(w) \rightarrow Q_8(w, f)$

Supplement: supplementary_material [file attachment]

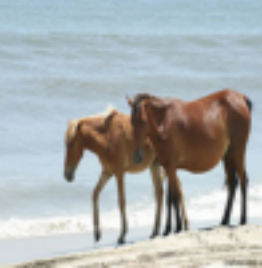

Source

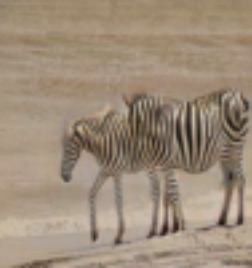

Baseline

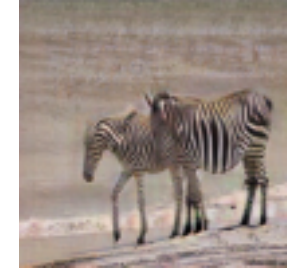

$P_{0.5}(w) \rightarrow Q_{12}(w, f)$

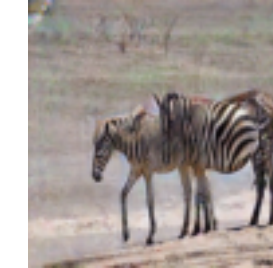

$P_{0.5}(w, f) \rightarrow Q_{12}(w, f)$

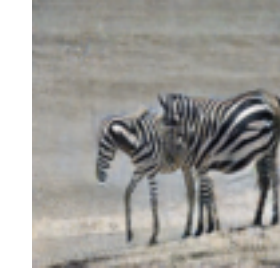

$Q_{12}(w, f) \rightarrow P_{0.5}(w, f)$

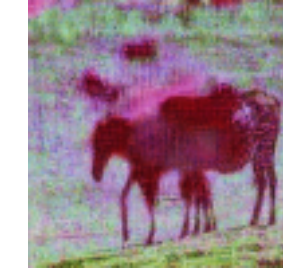

$P_{0.5}(w) \rightarrow Q_8(w, f)$

Supplement: supplementary_material [file attachment]

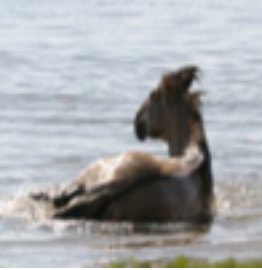

Source

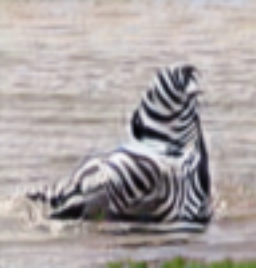

Baseline

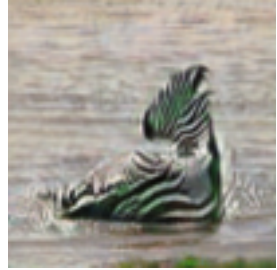

$P_{0.5}(w) \rightarrow Q_{12}(w, f)$

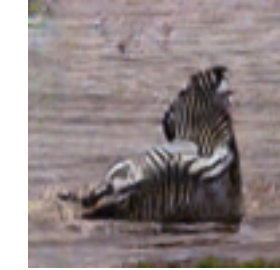

$P_{0.5}(w, f) \rightarrow Q_{12}(w, f)$

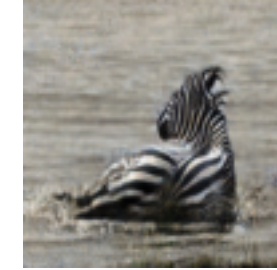

$Q_{12}(w, f) \rightarrow P_{0.5}(w, f)$

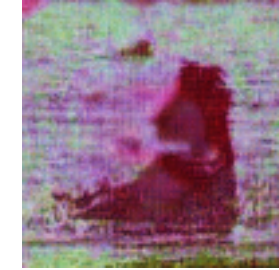

$P_{0.5}(w) \rightarrow Q_8(w, f)$

Supplement: supplementary_material [file attachment]

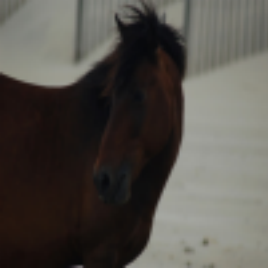

Source

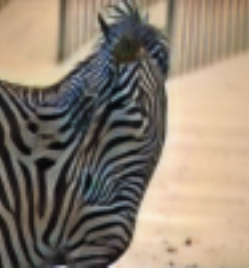

Baseline

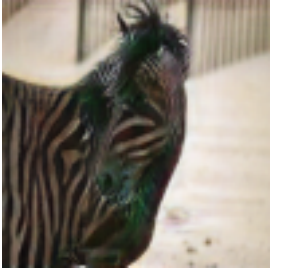

$P_{0.5}(w) \rightarrow Q_{12}(w, f)$

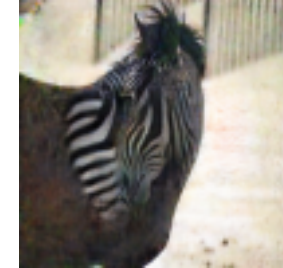

$P_{0.5}(w, f) \rightarrow Q_{12}(w, f)$

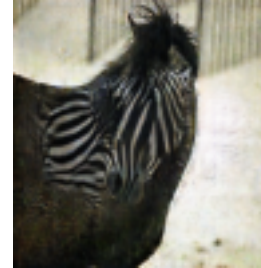

$Q_{12}(w, f) \rightarrow P_{0.5}(w, f)$

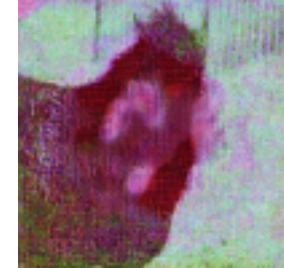

$P_{0.5}(w) \rightarrow Q_8(w, f)$

Supplement: supplementary_material [file attachment]

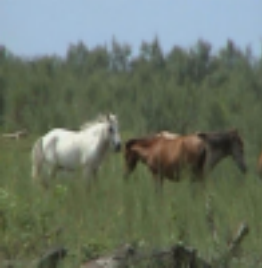

Source

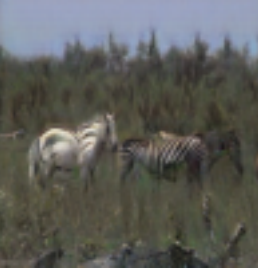

Baseline

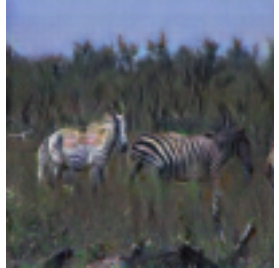

$P_{0.5}(w) \rightarrow Q_{12}(w, f)$

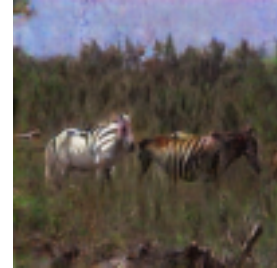

$P_{0.5}(w, f) \rightarrow Q_{12}(w, f)$

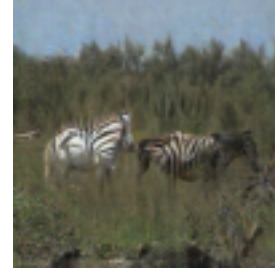

$Q_{12}(w, f) \rightarrow P_{0.5}(w, f)$

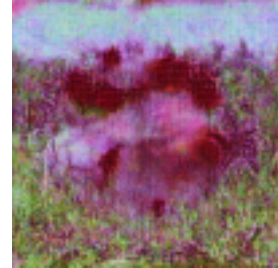

$P_{0.5}(w) \rightarrow Q_8(w, f)$

Supplement: supplementary_material [file attachment]

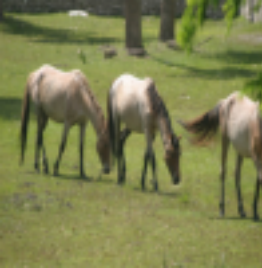

Source

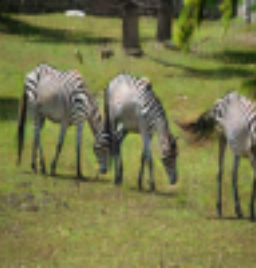

Baseline

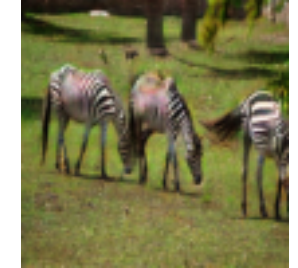

$P_{0.5}(w) \rightarrow Q_{12}(w, f)$

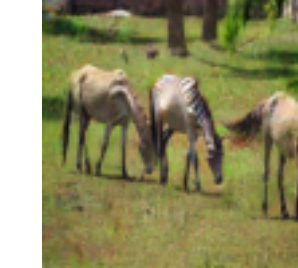

$P_{0.5}(w, f) \rightarrow Q_{12}(w, f)$

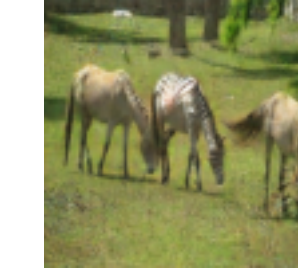

$Q_{12}(w, f) \rightarrow P_{0.5}(w, f)$

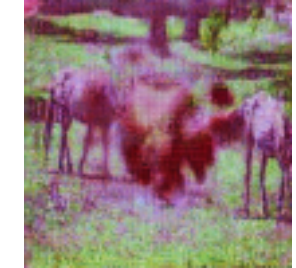

$P_{0.5}(w) \rightarrow Q_8(w, f)$

Supplement: supplementary_material [file attachment]

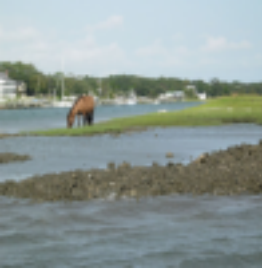

Source

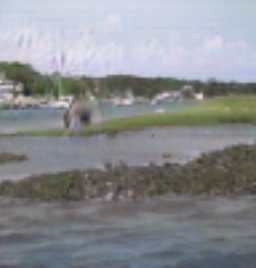

Baseline

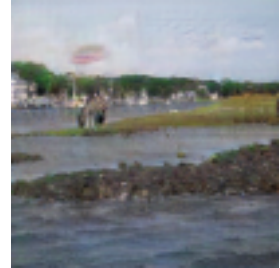

$P_{0.5}(w) \rightarrow Q_{12}(w, f)$

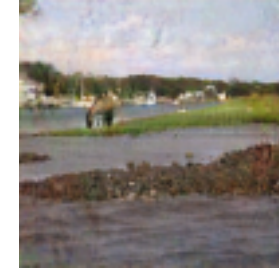

$P_{0.5}(w, f) \rightarrow Q_{12}(w, f)$

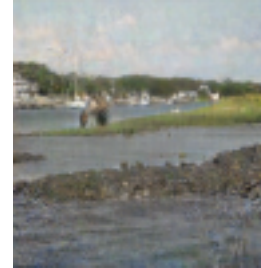

$Q_{12}(w, f) \rightarrow P_{0.5}(w, f)$

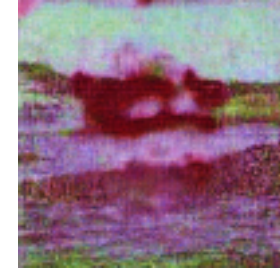

$P_{0.5}(w) \rightarrow Q_8(w, f)$

Supplement: supplementary_material [file attachment]

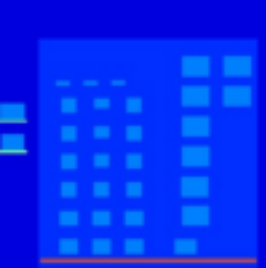

Input

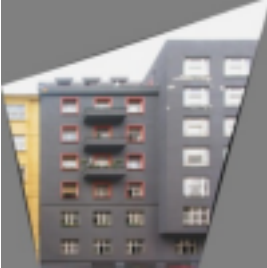

Groundtruth

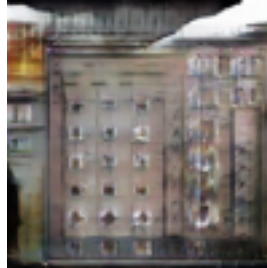

Baseline

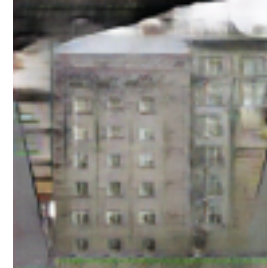

$P_{0.5}(w) \rightarrow Q_8(w, f)$

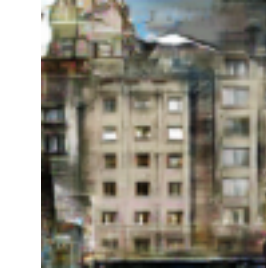

$Q_8(w, f) \rightarrow P_{0.5}(w, f)$

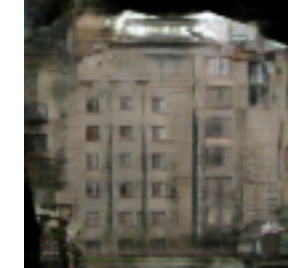

$P_{0.5}(w, f) \rightarrow Q_8(w, f)$

Supplement: supplementary_material [file attachment]

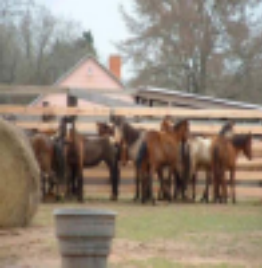

Source

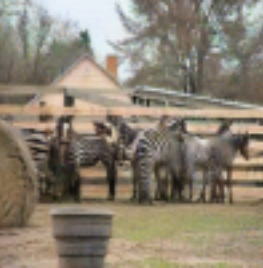

Baseline

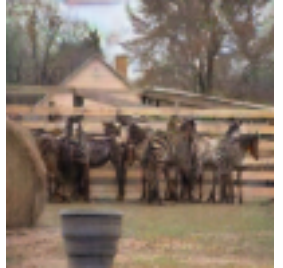

$P_{0.5}(w) \rightarrow Q_{12}(w, f)$

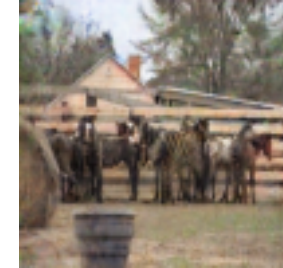

$P_{0.5}(w, f) \rightarrow Q_{12}(w, f)$

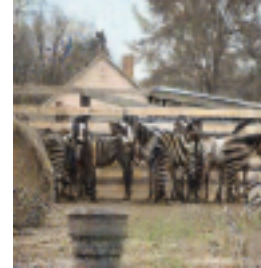

$Q_{12}(w, f) \rightarrow P_{0.5}(w, f)$

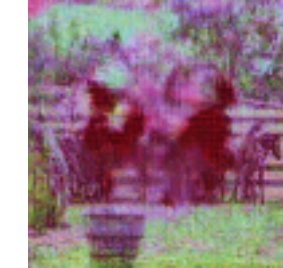

$P_{0.5}(w) \rightarrow Q_8(w, f)$

Supplement: supplementary_material [file attachment]

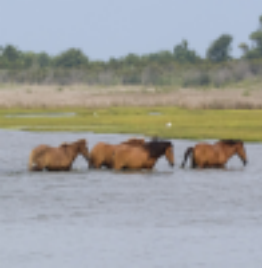

Source

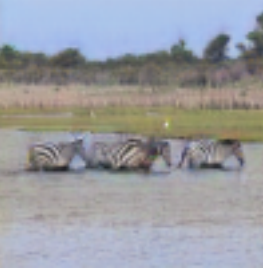

Baseline

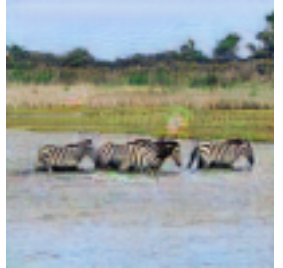

$P_{0.5}(w) \rightarrow Q_{12}(w, f)$

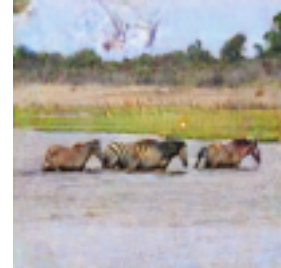

$P_{0.5}(w, f) \rightarrow Q_{12}(w, f)$

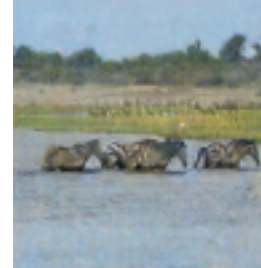

$Q_{12}(w, f) \rightarrow P_{0.5}(w, f)$

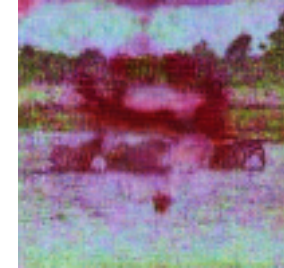

$P_{0.5}(w) \rightarrow Q_8(w, f)$

Supplement: supplementary_material [file attachment]

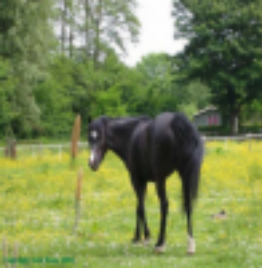

Source

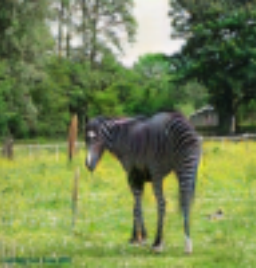

Baseline

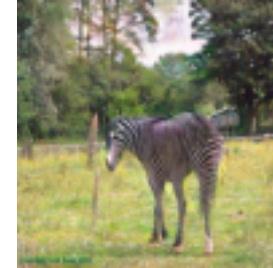

$P_{0.5}(w) \rightarrow Q_{12}(w, f)$

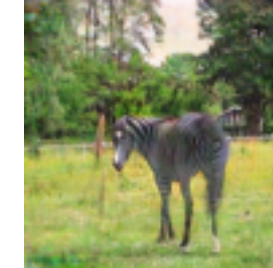

$P_{0.5}(w, f) \rightarrow Q_{12}(w, f)$

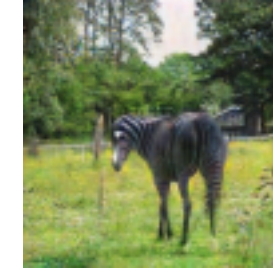

$Q_{12}(w, f) \rightarrow P_{0.5}(w, f)$

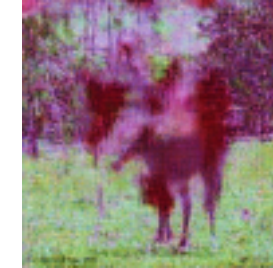

$P_{0.5}(w) \rightarrow Q_8(w, f)$

Supplement: supplementary_material [file attachment]

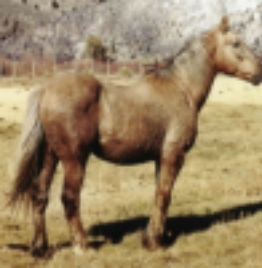

Source

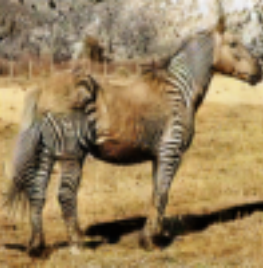

Baseline

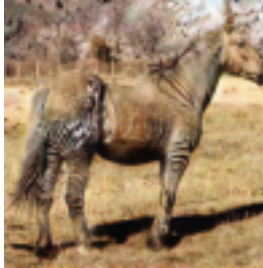

$P_{0.5}(w) \rightarrow Q_{12}(w, f)$

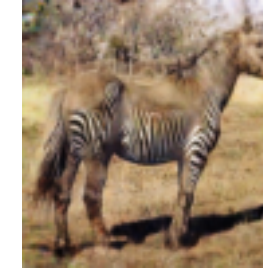

$P_{0.5}(w, f) \rightarrow Q_{12}(w, f)$

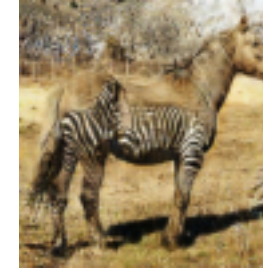

$Q_{12}(w, f) \rightarrow P_{0.5}(w, f)$

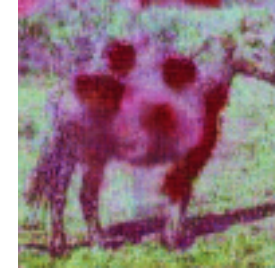

$P_{0.5}(w) \rightarrow Q_8(w, f)$

Supplement: supplementary_material [file attachment]

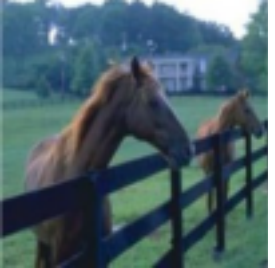

Source

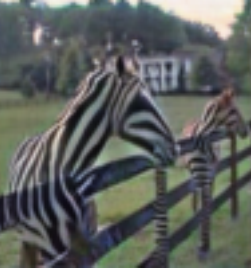

Baseline

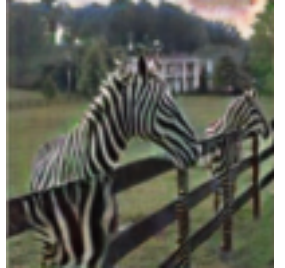

$P_{0.5}(w) \rightarrow Q_{12}(w, f)$

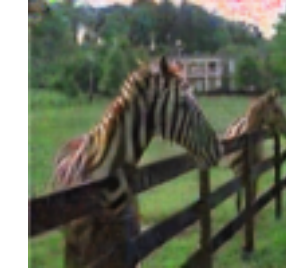

$P_{0.5}(w, f) \rightarrow Q_{12}(w, f)$

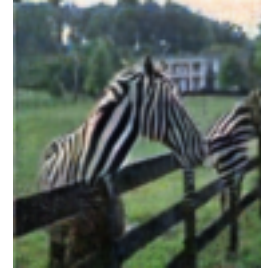

$Q_{12}(w, f) \rightarrow P_{0.5}(w, f)$

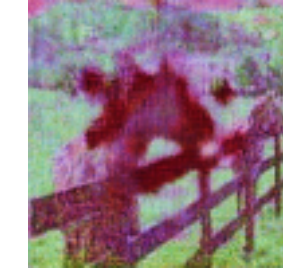

$P_{0.5}(w) \rightarrow Q_8(w, f)$

Supplement: supplementary_material [file attachment]

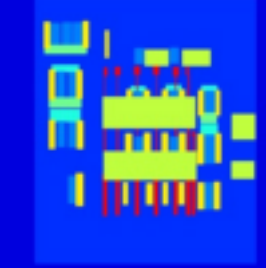

Input

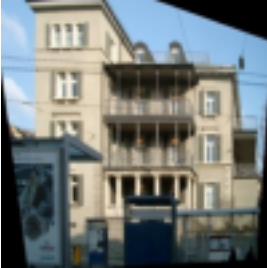

Groundtruth

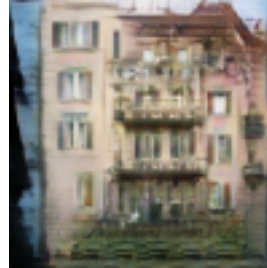

Baseline

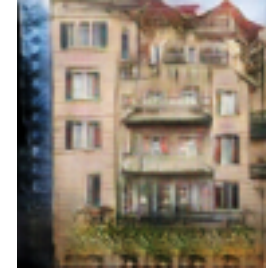

$P_{0.5}(w) \rightarrow Q_8(w, f)$

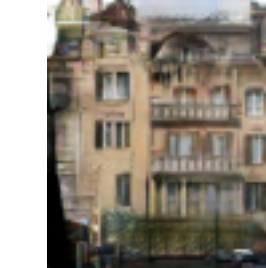

$Q_8(w, f) \rightarrow P_{0.5}(w, f)$

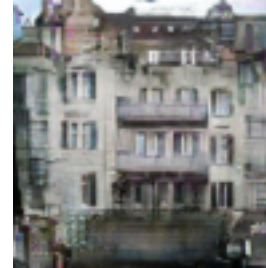

$P_{0.5}(w, f) \rightarrow Q_8(w, f)$

Supplement: supplementary_material [file attachment]

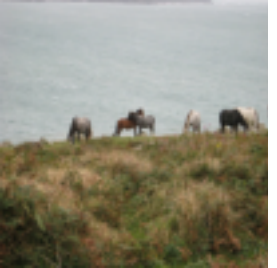

Source

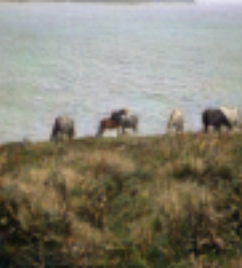

Baseline

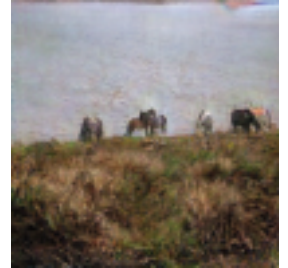

$P_{0.5}(w) \rightarrow Q_{12}(w, f)$

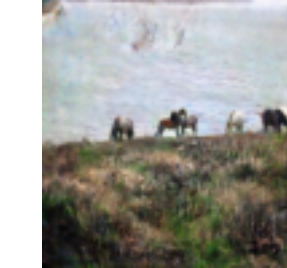

$P_{0.5}(w, f) \rightarrow Q_{12}(w, f)$

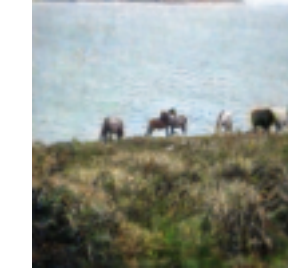

$Q_{12}(w, f) \rightarrow P_{0.5}(w, f)$

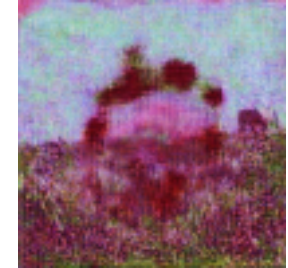

$P_{0.5}(w) \rightarrow Q_8(w, f)$

Supplement: supplementary_material [file attachment]

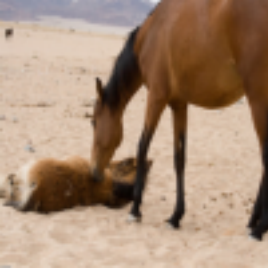

Source

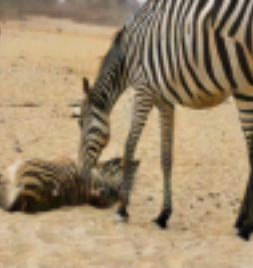

Baseline

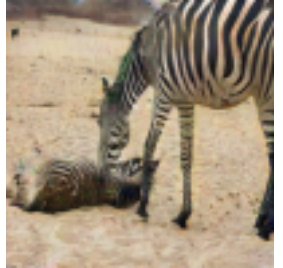

$P_{0.5}(w) \rightarrow Q_{12}(w, f)$

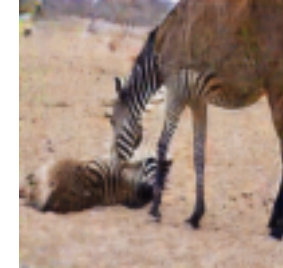

$P_{0.5}(w, f) \rightarrow Q_{12}(w, f)$

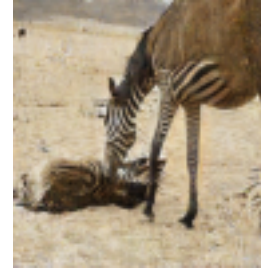

$Q_{12}(w, f) \rightarrow P_{0.5}(w, f)$

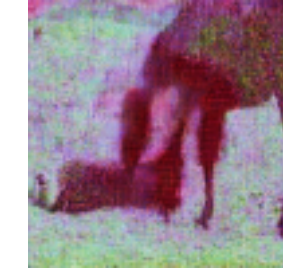

$P_{0.5}(w) \rightarrow Q_8(w, f)$

Supplement: supplementary_material [file attachment]

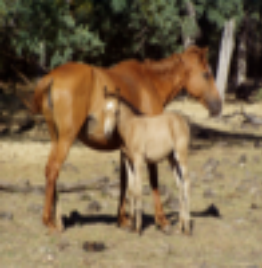

Source

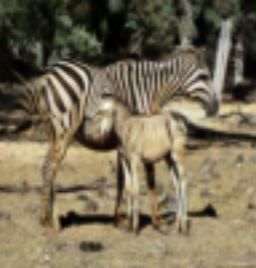

Baseline

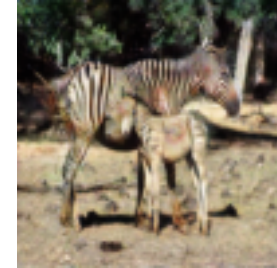

$P_{0.5}(w) \rightarrow Q_{12}(w, f)$

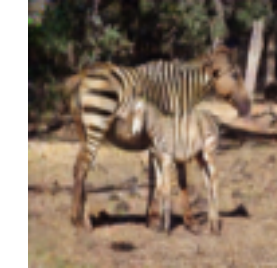

$P_{0.5}(w, f) \rightarrow Q_{12}(w, f)$

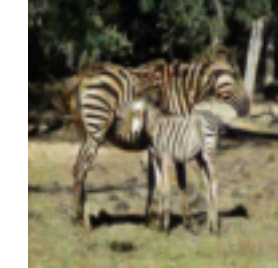

$Q_{12}(w, f) \rightarrow P_{0.5}(w, f)$

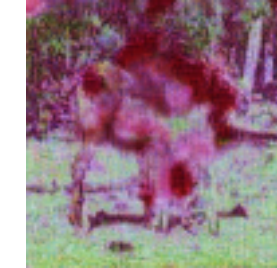

$P_{0.5}(w) \rightarrow Q_8(w, f)$

Supplement: supplementary_material [file attachment]

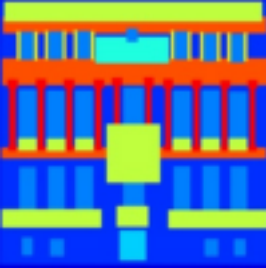

Input

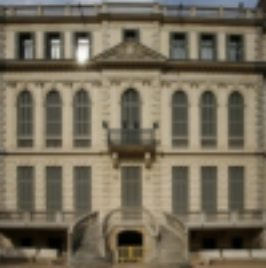

Groundtruth

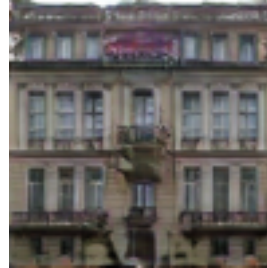

Baseline

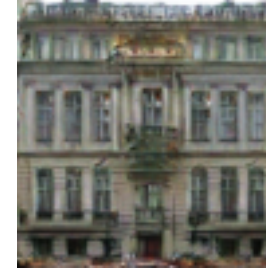

$P_{0.5}(w) \rightarrow Q_8(w, f)$

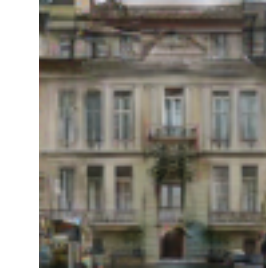

$Q_8(w, f) \rightarrow P_{0.5}(w, f)$

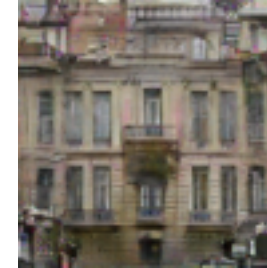

$P_{0.5}(w, f) \rightarrow Q_8(w, f)$

Supplement: supplementary_material [file attachment]

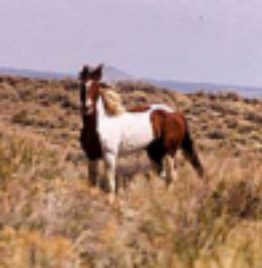

Source

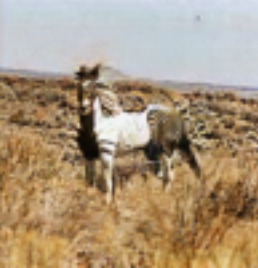

Baseline

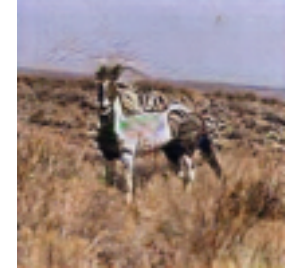

$P_{0.5}(w) \rightarrow Q_{12}(w, f)$

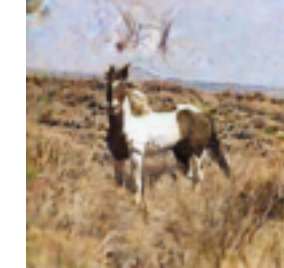

$P_{0.5}(w, f) \rightarrow Q_{12}(w, f)$

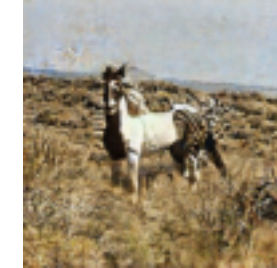

$Q_{12}(w, f) \rightarrow P_{0.5}(w, f)$

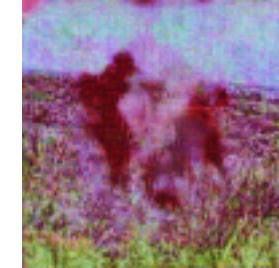

$P_{0.5}(w) \rightarrow Q_8(w, f)$

Supplement: supplementary_material [file attachment]

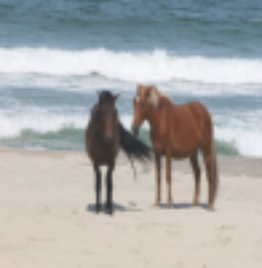

Source

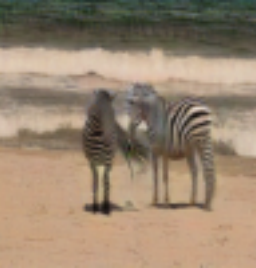

Baseline

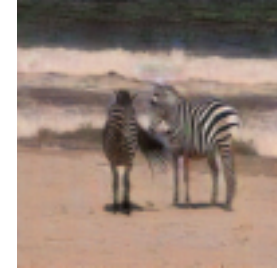

$P_{0.5}(w) \rightarrow Q_{12}(w, f)$

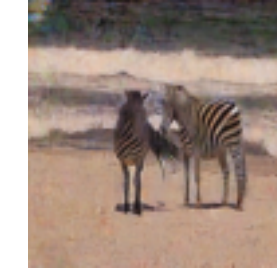

$P_{0.5}(w, f) \rightarrow Q_{12}(w, f)$

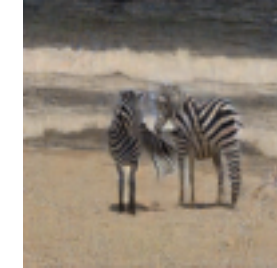

$Q_{12}(w, f) \rightarrow P_{0.5}(w, f)$

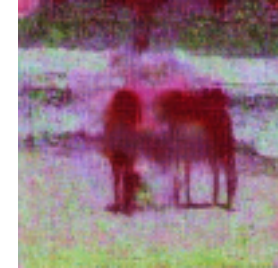

$P_{0.5}(w) \rightarrow Q_8(w, f)$

Supplement: supplementary_material [file attachment]

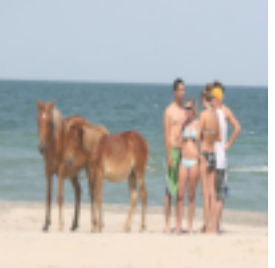

Source

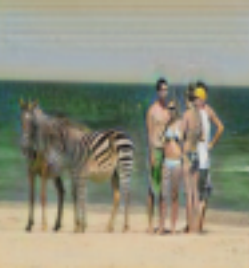

Baseline

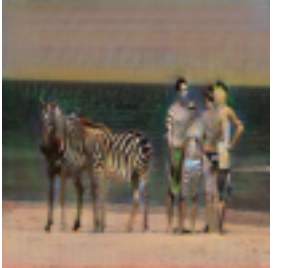

$P_{0.5}(w) \rightarrow Q_{12}(w, f)$

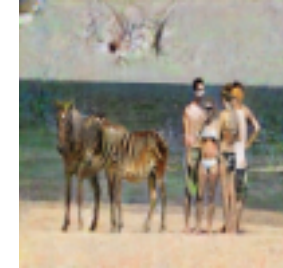

$P_{0.5}(w, f) \rightarrow Q_{12}(w, f)$

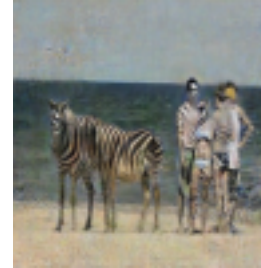

$Q_{12}(w, f) \rightarrow P_{0.5}(w, f)$

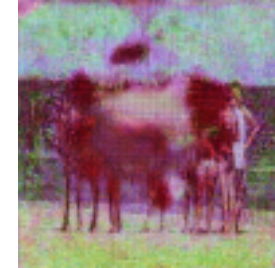

$P_{0.5}(w) \rightarrow Q_8(w, f)$

Supplement: supplementary_material [file attachment]

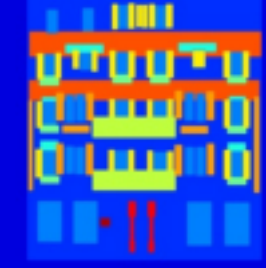

Input

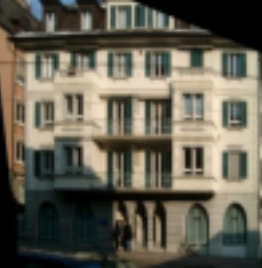

Groundtruth

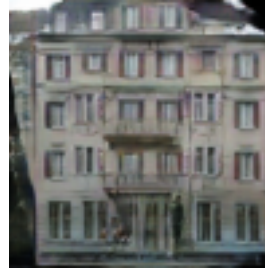

Baseline

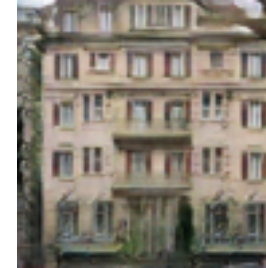

$P_{0.5}(w) \rightarrow Q_8(w, f)$

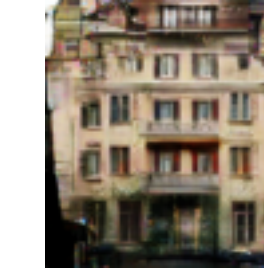

$Q_8(w, f) \rightarrow P_{0.5}(w, f)$

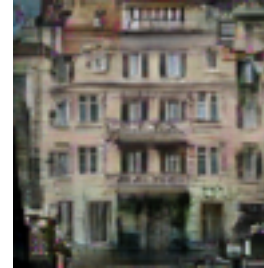

$P_{0.5}(w, f) \rightarrow Q_8(w, f)$

Supplement: supplementary_material [file attachment]

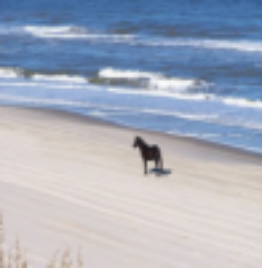

Source

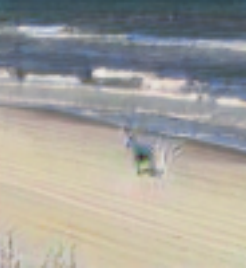

Baseline

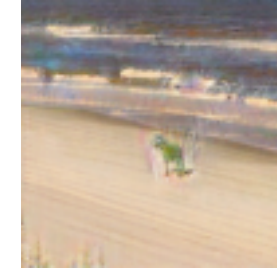

$P_{0.5}(w) \rightarrow Q_{12}(w, f)$

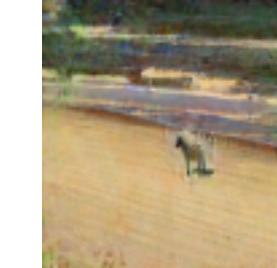

$P_{0.5}(w, f) \rightarrow Q_{12}(w, f)$

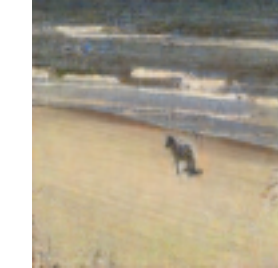

$Q_{12}(w, f) \rightarrow P_{0.5}(w, f)$

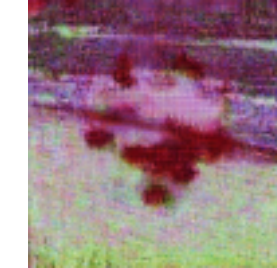

$P_{0.5}(w) \rightarrow Q_8(w, f)$

Supplement: supplementary_material [file attachment]

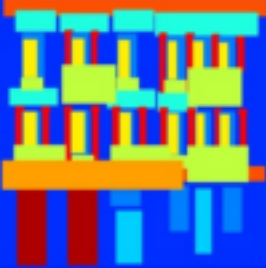

Input

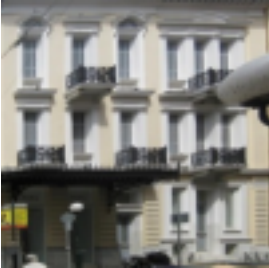

Groundtruth

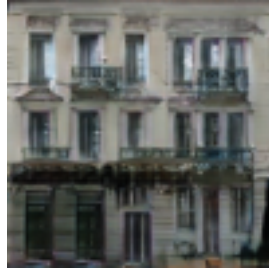

Baseline

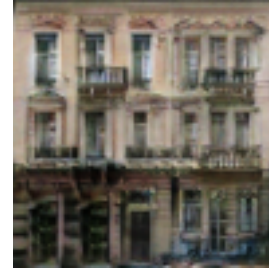

$P_{0.5}(w) \rightarrow Q_8(w, f)$

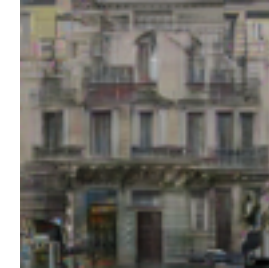

$Q_8(w, f) \rightarrow P_{0.5}(w, f)$

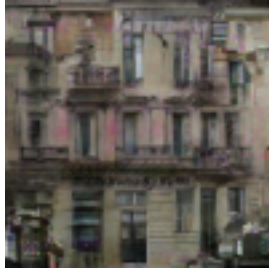

$P_{0.5}(w, f) \rightarrow Q_8(w, f)$

Supplement: supplementary_material [file attachment]

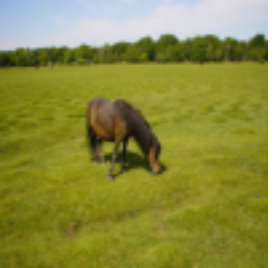

Source

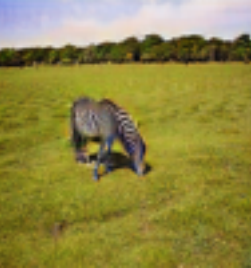

Baseline

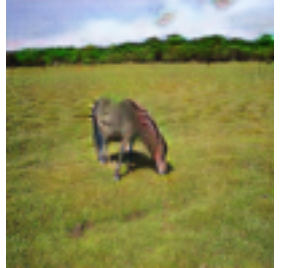

$P_{0.5}(w) \rightarrow Q_{12}(w, f)$

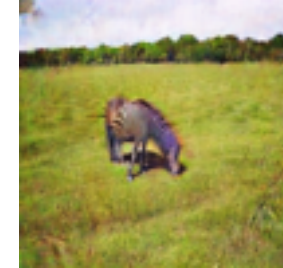

$P_{0.5}(w, f) \rightarrow Q_{12}(w, f)$

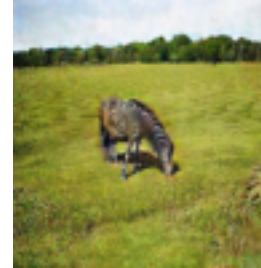

$Q_{12}(w, f) \rightarrow P_{0.5}(w, f)$

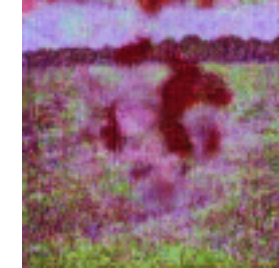

$P_{0.5}(w) \rightarrow Q_8(w, f)$

Supplement: supplementary_material [file attachment]

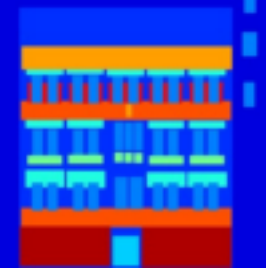

Input

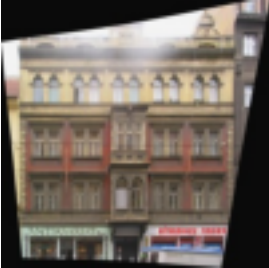

Groundtruth

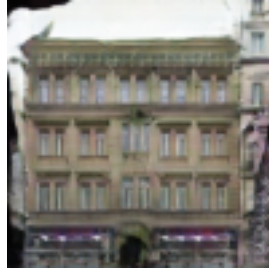

Baseline

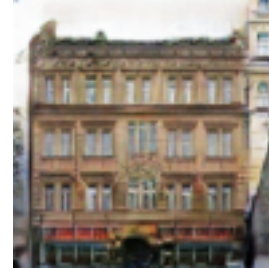

$P_{0.5}(w) \rightarrow Q_8(w, f)$

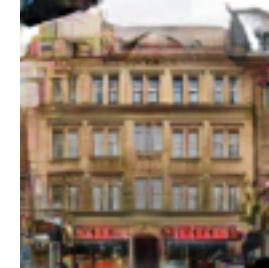

$Q_8(w, f) \rightarrow P_{0.5}(w, f)$

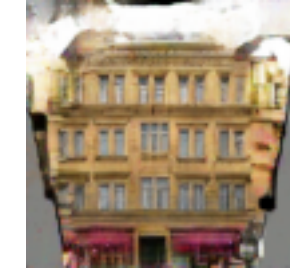

$P_{0.5}(w, f) \rightarrow Q_8(w, f)$

Supplement: supplementary_material [file attachment]

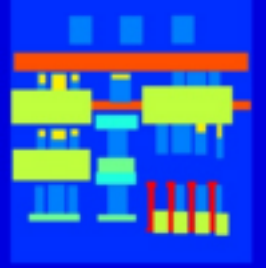

Input

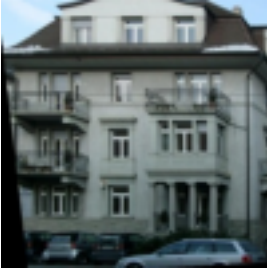

Groundtruth

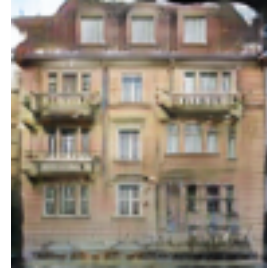

Baseline

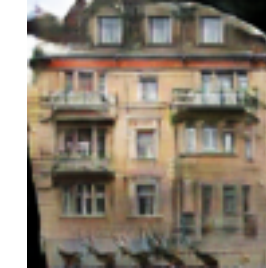

$P_{0.5}(w) \rightarrow Q_8(w, f)$

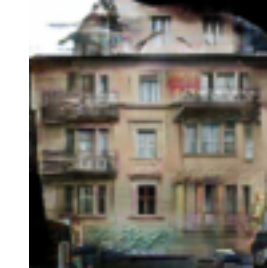

$Q_8(w, f) \rightarrow P_{0.5}(w, f)$

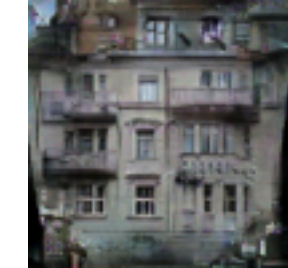

$P_{0.5}(w, f) \rightarrow Q_8(w, f)$

Supplement: supplementary_material [file attachment]

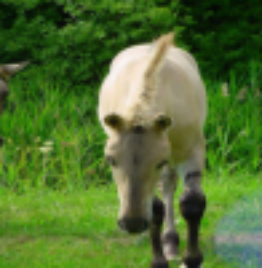

Source

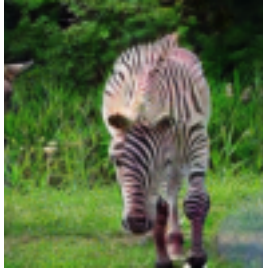

Baseline

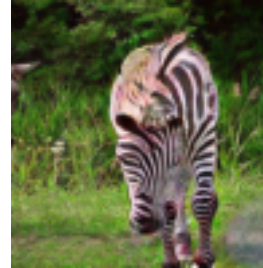

$P_{0.5}(w) \rightarrow Q_{12}(w, f)$

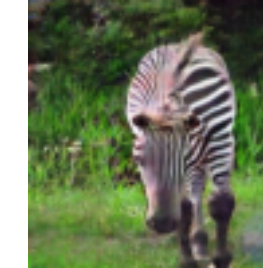

$P_{0.5}(w, f) \rightarrow Q_{12}(w, f)$

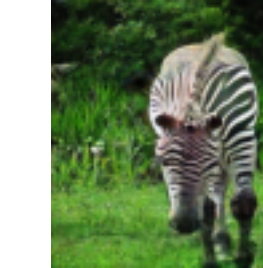

$Q_{12}(w, f) \rightarrow P_{0.5}(w, f)$

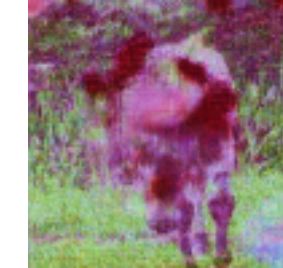

$P_{0.5}(w) \rightarrow Q_8(w, f)$

Supplement: supplementary_material [file attachment]

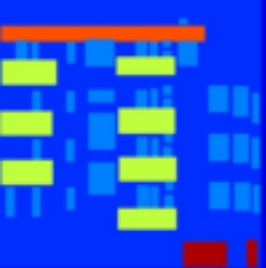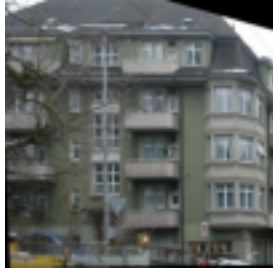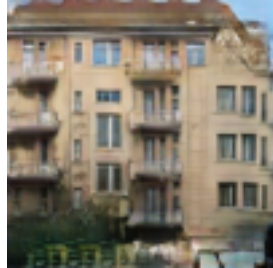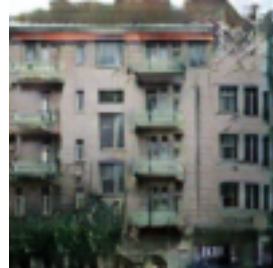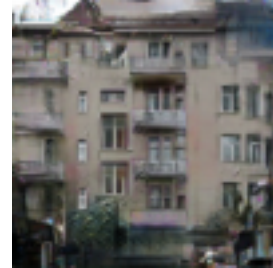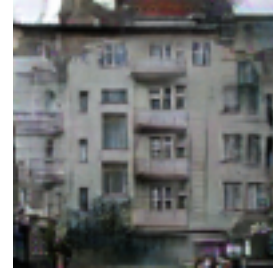

Input

Groundtruth

Baseline

$P_{0.5}(w) \rightarrow Q_8(w, f)$

$Q_8(w, f) \rightarrow P_{0.5}(w, f)$

$P_{0.5}(w, f) \rightarrow Q_8(w, f)$

Supplement: supplementary_material [file attachment]

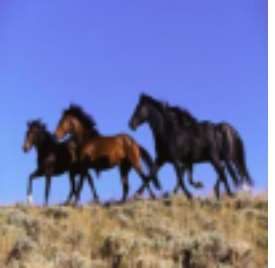

Source

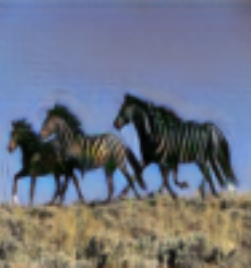

Baseline

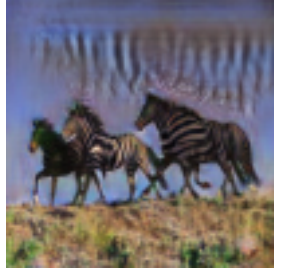

$P_{0.5}(w) \rightarrow Q_{12}(w, f)$

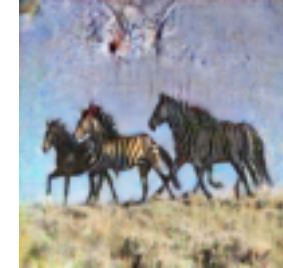

$P_{0.5}(w, f) \rightarrow Q_{12}(w, f)$

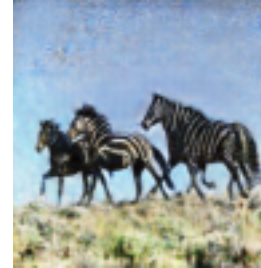

$Q_{12}(w, f) \rightarrow P_{0.5}(w, f)$

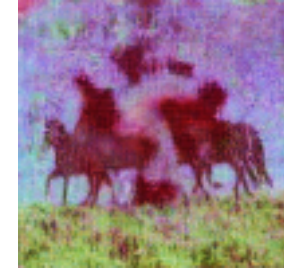

$P_{0.5}(w) \rightarrow Q_8(w, f)$

Supplement: supplementary_material [file attachment]

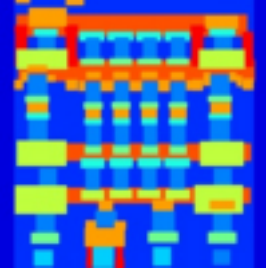

Input

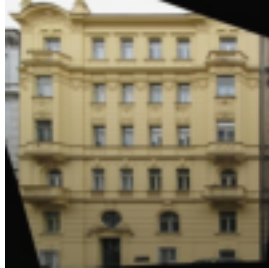

Groundtruth

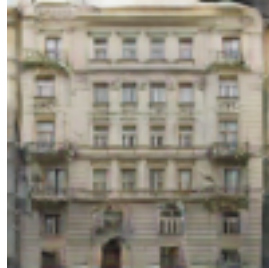

Baseline

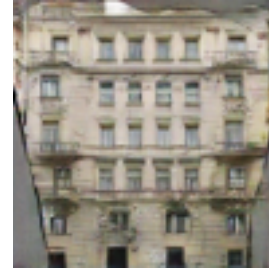

$P_{0.5}(w) \rightarrow Q_8(w, f)$

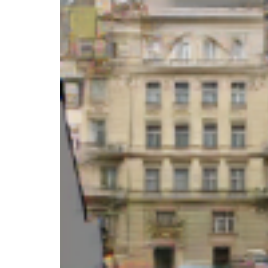

$Q_8(w, f) \rightarrow P_{0.5}(w, f)$

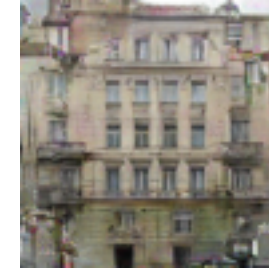

$P_{0.5}(w, f) \rightarrow Q_8(w, f)$

Supplement: supplementary_material [file attachment]

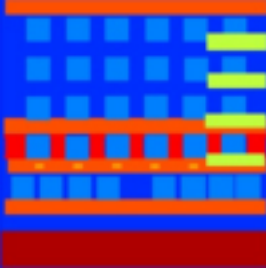

Input

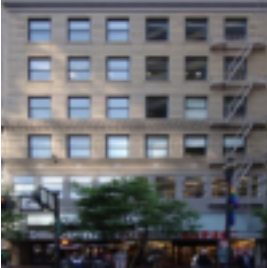

Groundtruth

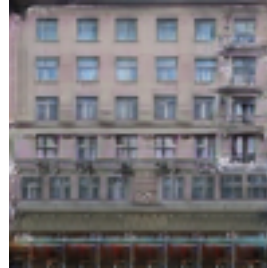

Baseline

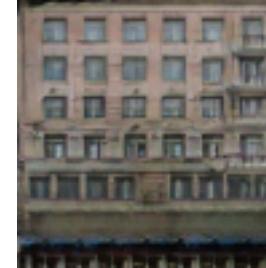

$P_{0.5}(w) \rightarrow Q_8(w, f)$

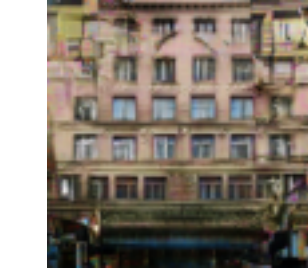

$Q_8(w, f) \rightarrow P_{0.5}(w, f)$

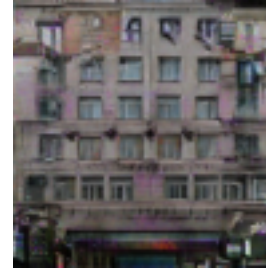

$P_{0.5}(w, f) \rightarrow Q_8(w, f)$

Supplement: supplementary_material [file attachment]

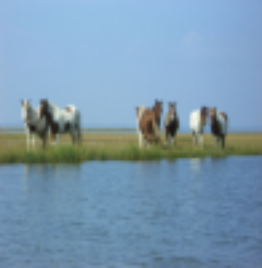

Source

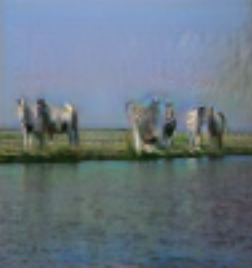

Baseline

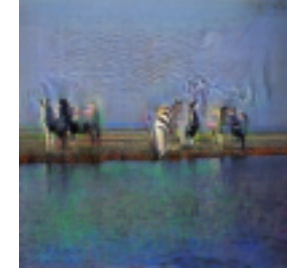

$P_{0.5}(w) \rightarrow Q_{12}(w, f)$

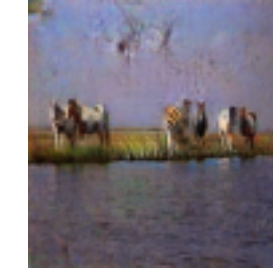

$P_{0.5}(w, f) \rightarrow Q_{12}(w, f)$

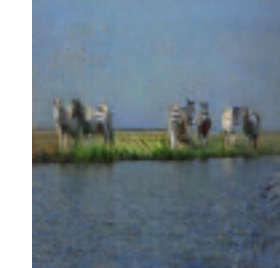

$Q_{12}(w, f) \rightarrow P_{0.5}(w, f)$

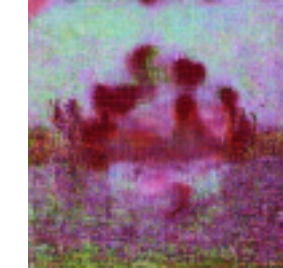

$P_{0.5}(w) \rightarrow Q_8(w, f)$

Supplement: supplementary_material [file attachment]

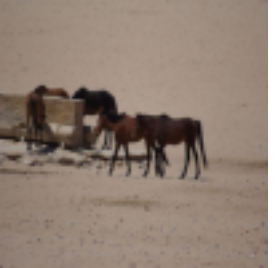

Source

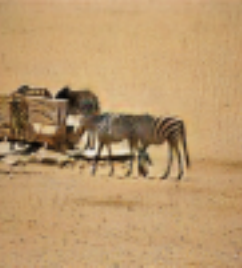

Baseline

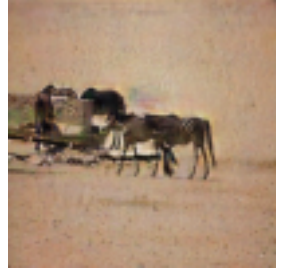

$P_{0.5}(w) \rightarrow Q_{12}(w, f)$

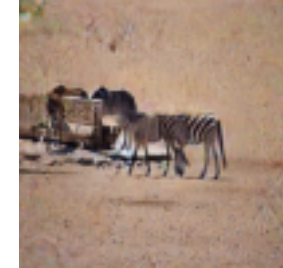

$P_{0.5}(w, f) \rightarrow Q_{12}(w, f)$

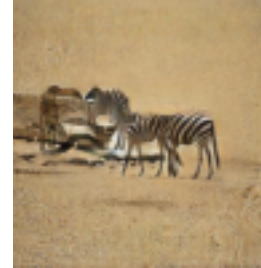

$Q_{12}(w, f) \rightarrow P_{0.5}(w, f)$

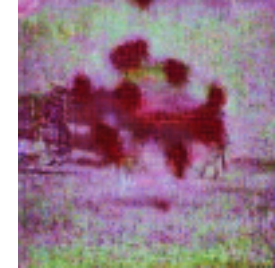

$P_{0.5}(w) \rightarrow Q_8(w, f)$

Supplement: supplementary_material [file attachment]

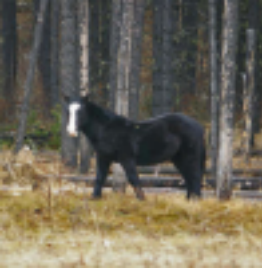

Source

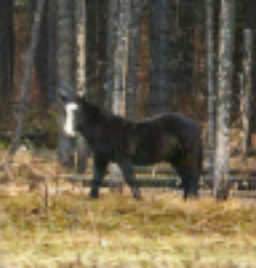

Baseline

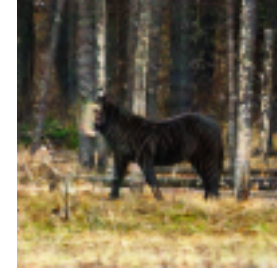

$P_{0.5}(w) \rightarrow Q_{12}(w, f)$

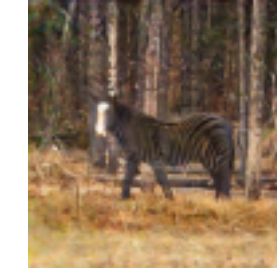

$P_{0.5}(w, f) \rightarrow Q_{12}(w, f)$

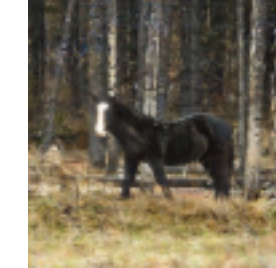

$Q_{12}(w, f) \rightarrow P_{0.5}(w, f)$

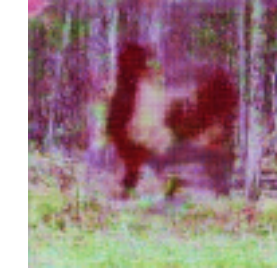

$P_{0.5}(w) \rightarrow Q_8(w, f)$

Supplement: supplementary_material [file attachment]

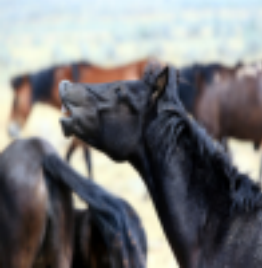

Source

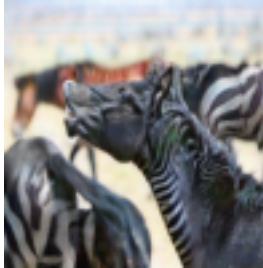

Baseline

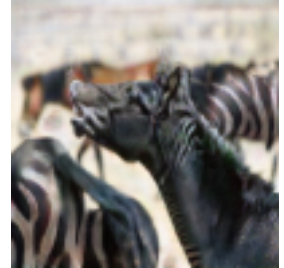

$P_{0.5}(w) \rightarrow Q_{12}(w, f)$

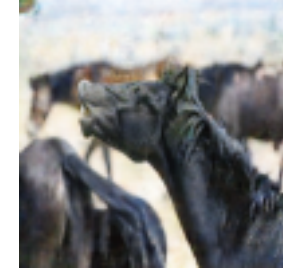

$P_{0.5}(w, f) \rightarrow Q_{12}(w, f)$

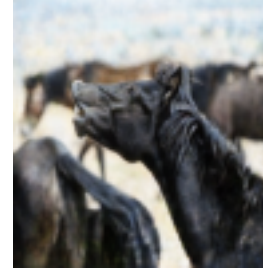

$Q_{12}(w, f) \rightarrow P_{0.5}(w, f)$

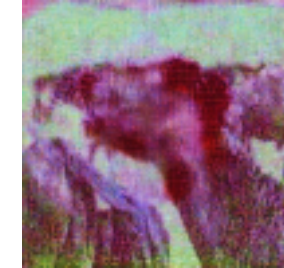

$P_{0.5}(w) \rightarrow Q_8(w, f)$

Supplement: supplementary_material [file attachment]

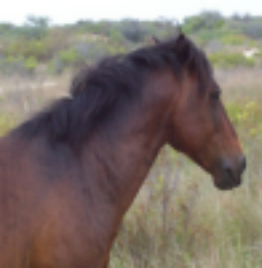

Source

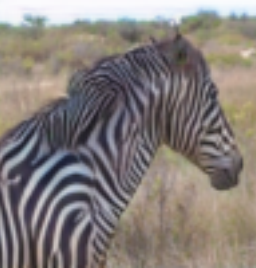

Baseline

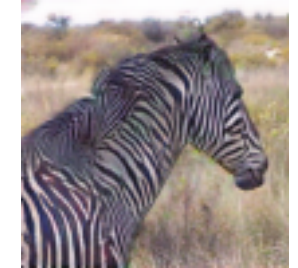

$P_{0.5}(w) \rightarrow Q_{12}(w, f)$

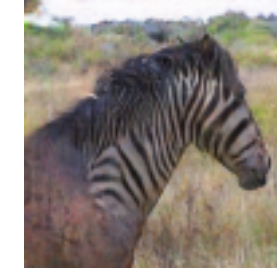

$P_{0.5}(w, f) \rightarrow Q_{12}(w, f)$

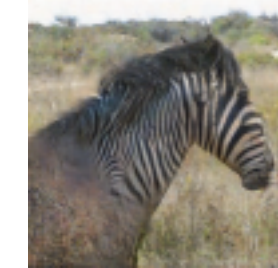

$Q_{12}(w, f) \rightarrow P_{0.5}(w, f)$

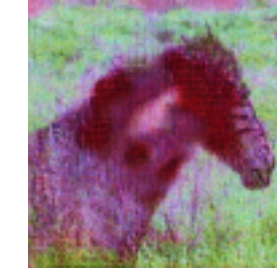

$P_{0.5}(w) \rightarrow Q_8(w, f)$

Supplement: supplementary_material [file attachment]

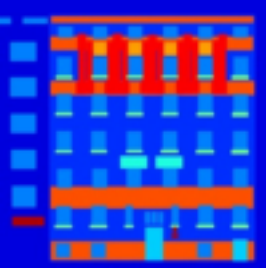

Input

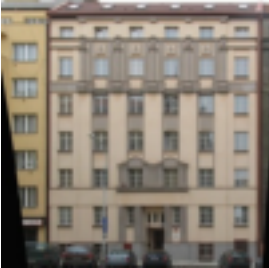

Groundtruth

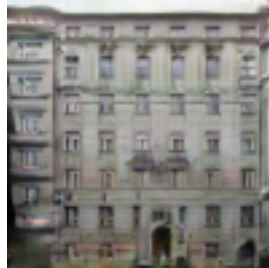

Baseline

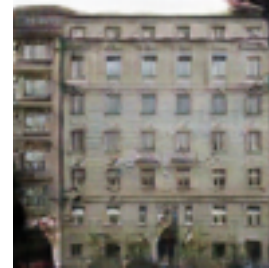

$P_{0.5}(w) \rightarrow Q_8(w, f)$

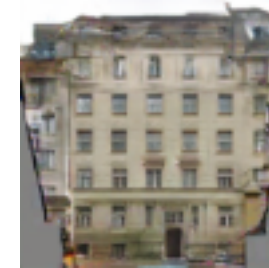

$Q_8(w, f) \rightarrow P_{0.5}(w, f)$

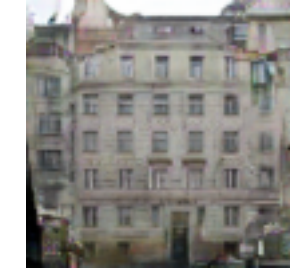

$P_{0.5}(w, f) \rightarrow Q_8(w, f)$

Supplement: supplementary_material [file attachment]

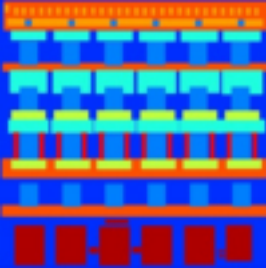

Input

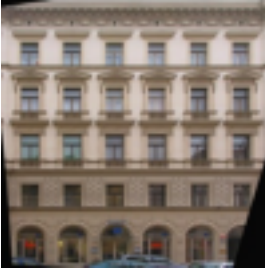

Groundtruth

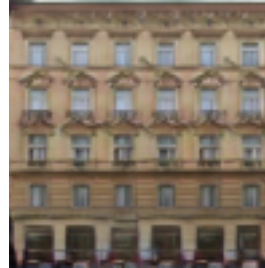

Baseline

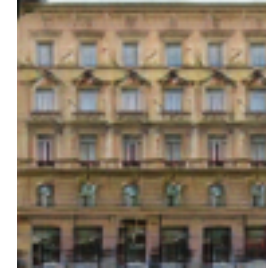

$P_{0.5}(w) \rightarrow Q_8(w, f)$

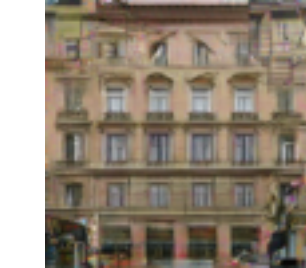

$Q_8(w, f) \rightarrow P_{0.5}(w, f)$

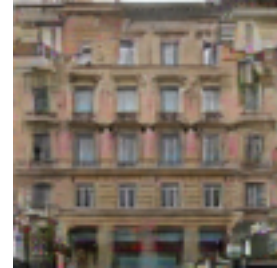

$P_{0.5}(w, f) \rightarrow Q_8(w, f)$

Supplement: supplementary_material [file attachment]

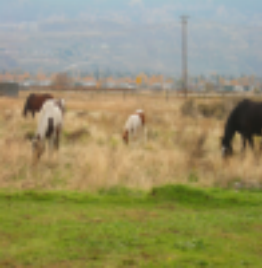

Source

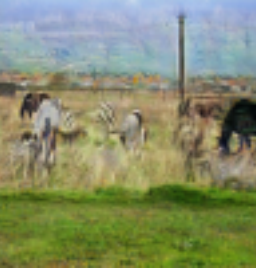

Baseline

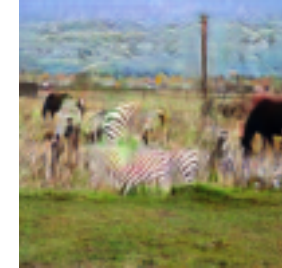

$P_{0.5}(w) \rightarrow Q_{12}(w, f)$

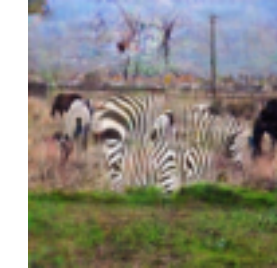

$P_{0.5}(w, f) \rightarrow Q_{12}(w, f)$

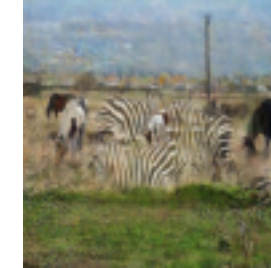

$Q_{12}(w, f) \rightarrow P_{0.5}(w, f)$

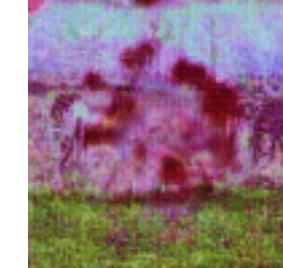

$P_{0.5}(w) \rightarrow Q_8(w, f)$

Supplement: supplementary_material [file attachment]

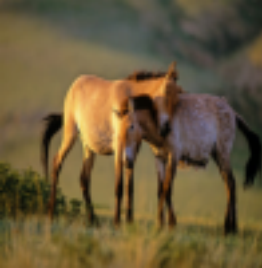

Source

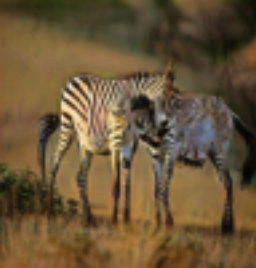

Baseline

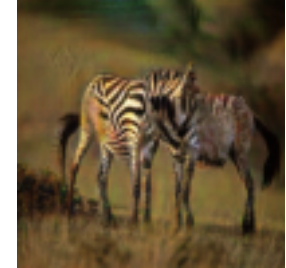

$P_{0.5}(w) \rightarrow Q_{12}(w, f)$

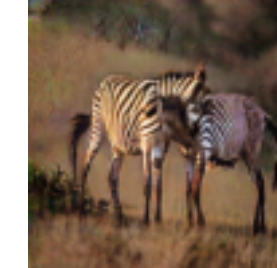

$P_{0.5}(w, f) \rightarrow Q_{12}(w, f)$

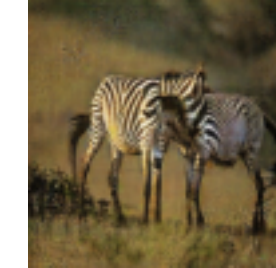

$Q_{12}(w, f) \rightarrow P_{0.5}(w, f)$

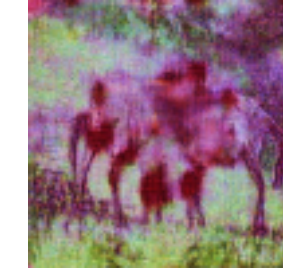

$P_{0.5}(w) \rightarrow Q_8(w, f)$

Supplement: supplementary_material [file attachment]

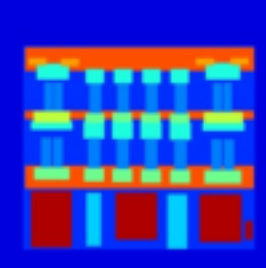

Input

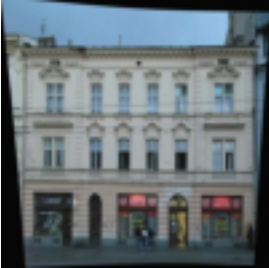

Groundtruth

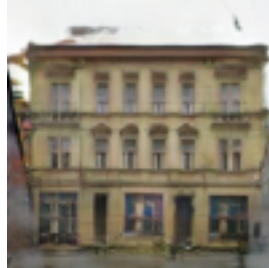

Baseline

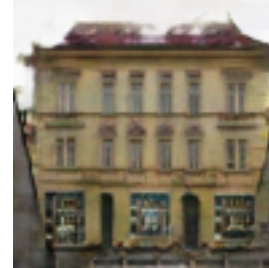

$P_{0.5}(w) \rightarrow Q_8(w, f)$

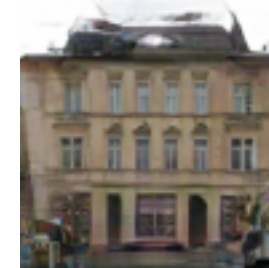

$Q_8(w, f) \rightarrow P_{0.5}(w, f)$

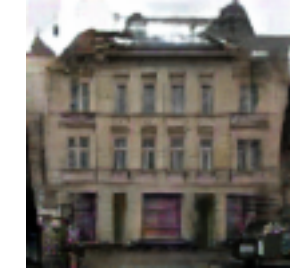

$P_{0.5}(w, f) \rightarrow Q_8(w, f)$

Supplement: supplementary_material [file attachment]

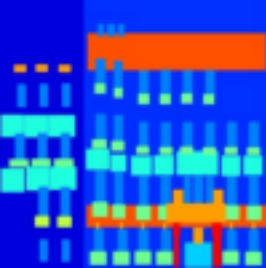

Input

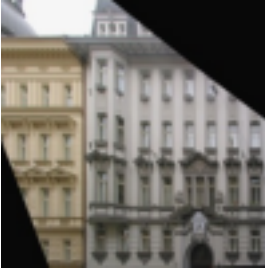

Groundtruth

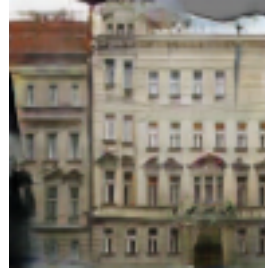

Baseline

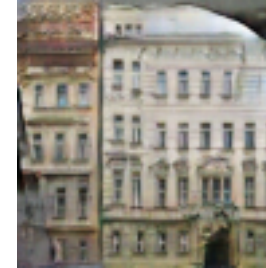

$P_{0.5}(w) \rightarrow Q_8(w, f)$

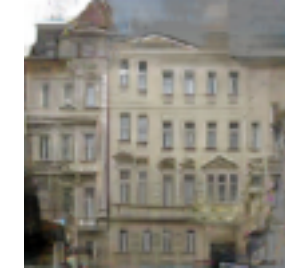

$Q_8(w, f) \rightarrow P_{0.5}(w, f)$

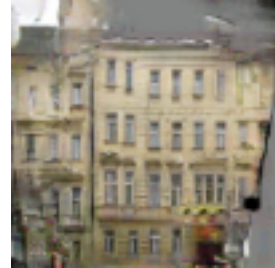

$P_{0.5}(w, f) \rightarrow Q_8(w, f)$

Supplement: supplementary_material [file attachment]

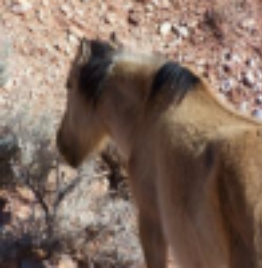

Source

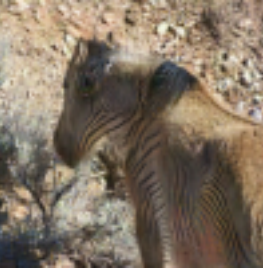

Baseline

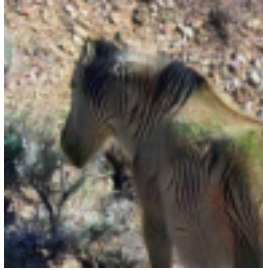

$P_{0.5}(w) \rightarrow Q_{12}(w, f)$

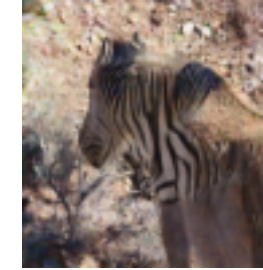

$P_{0.5}(w, f) \rightarrow Q_{12}(w, f)$

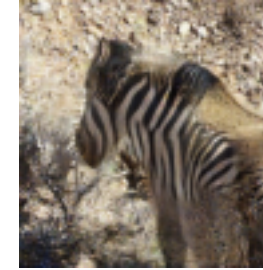

$Q_{12}(w, f) \rightarrow P_{0.5}(w, f)$

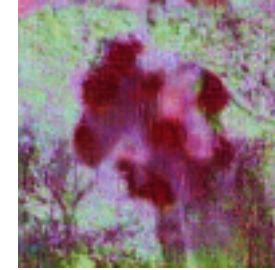

$P_{0.5}(w) \rightarrow Q_8(w, f)$

Supplement: supplementary_material [file attachment]

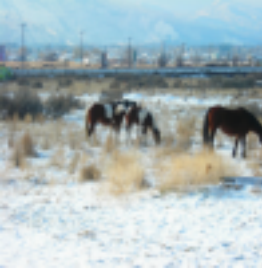

Source

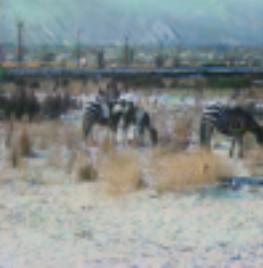

Baseline

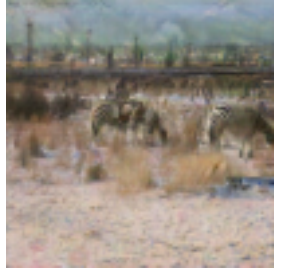

$P_{0.5}(w) \rightarrow Q_{12}(w, f)$

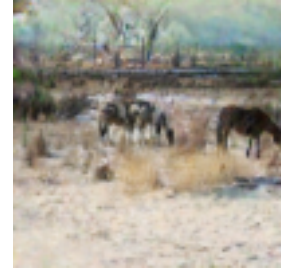

$P_{0.5}(w, f) \rightarrow Q_{12}(w, f)$

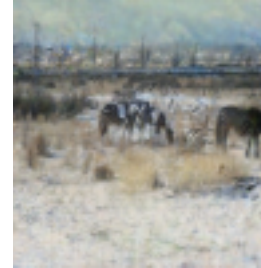

$Q_{12}(w, f) \rightarrow P_{0.5}(w, f)$

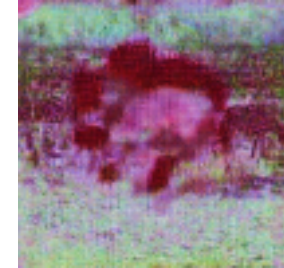

$P_{0.5}(w) \rightarrow Q_8(w, f)$

Supplement: supplementary_material [file attachment]

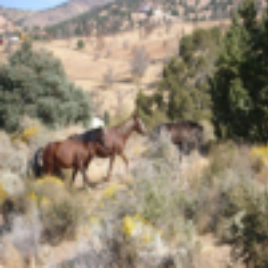

Source

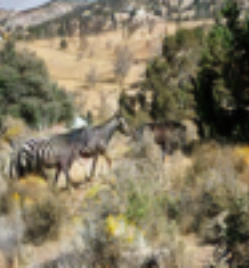

Baseline

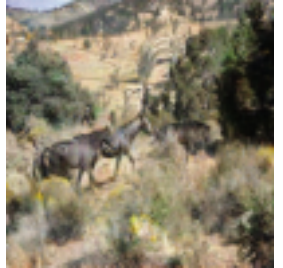

$P_{0.5}(w) \rightarrow Q_{12}(w, f)$

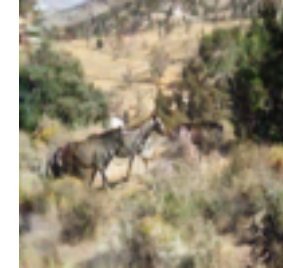

$P_{0.5}(w, f) \rightarrow Q_{12}(w, f)$

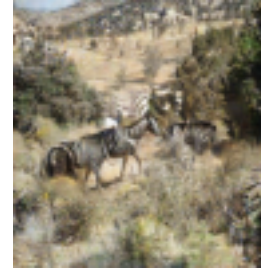

$Q_{12}(w, f) \rightarrow P_{0.5}(w, f)$

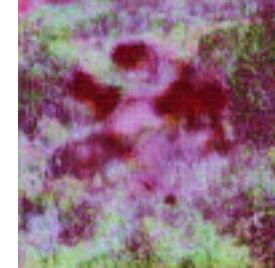

$P_{0.5}(w) \rightarrow Q_8(w, f)$

Supplement: supplementary_material [file attachment]

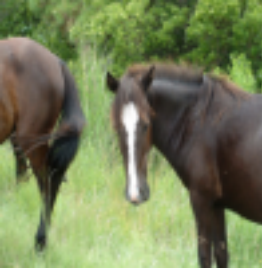

Source

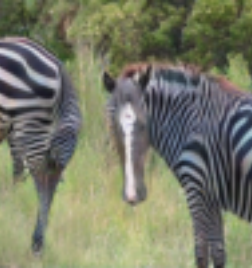

Baseline

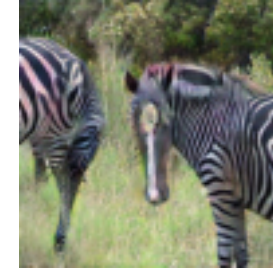

$P_{0.5}(w) \rightarrow Q_{12}(w, f)$

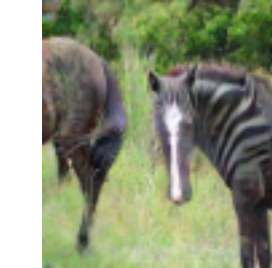

$P_{0.5}(w, f) \rightarrow Q_{12}(w, f)$

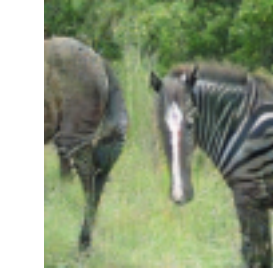

$Q_{12}(w, f) \rightarrow P_{0.5}(w, f)$

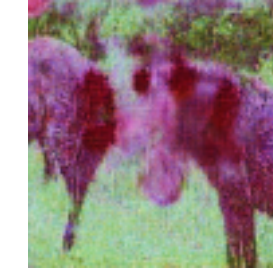

$P_{0.5}(w) \rightarrow Q_8(w, f)$

Supplement: supplementary_material [file attachment]

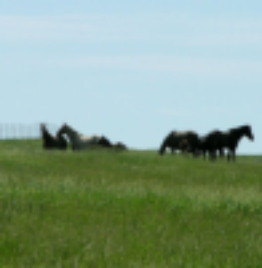

Source

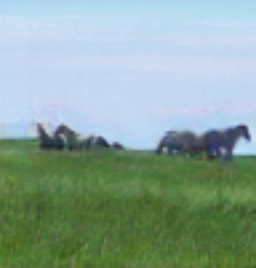

Baseline

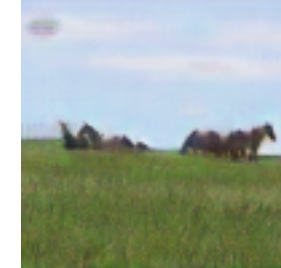

$P_{0.5}(w) \rightarrow Q_{12}(w, f)$

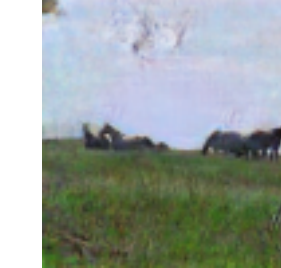

$P_{0.5}(w, f) \rightarrow Q_{12}(w, f)$

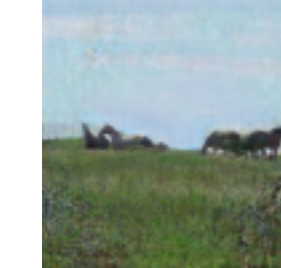

$Q_{12}(w, f) \rightarrow P_{0.5}(w, f)$

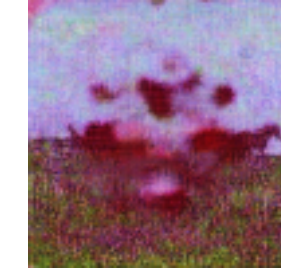

$P_{0.5}(w) \rightarrow Q_8(w, f)$

Supplement: supplementary_material [file attachment]

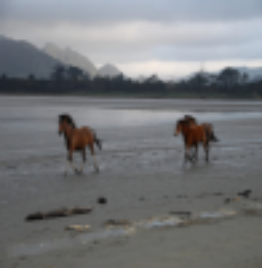

Source

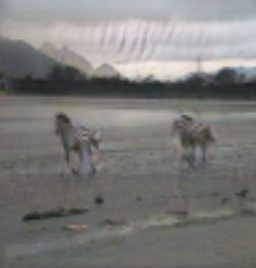

Baseline

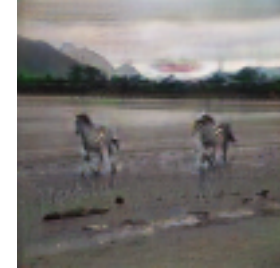

$P_{0.5}(w) \rightarrow Q_{12}(w, f)$

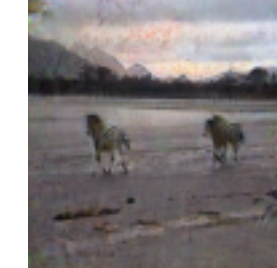

$P_{0.5}(w, f) \rightarrow Q_{12}(w, f)$

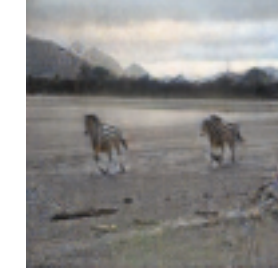

$Q_{12}(w, f) \rightarrow P_{0.5}(w, f)$

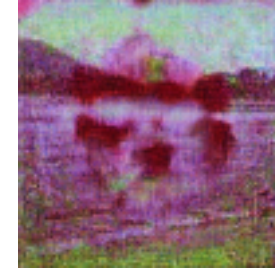

$P_{0.5}(w) \rightarrow Q_8(w, f)$

Supplement: supplementary_material [file attachment]

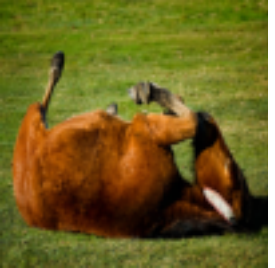

Source

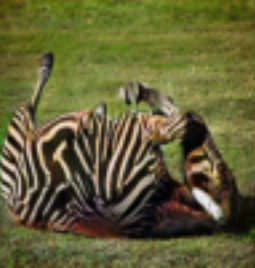

Baseline

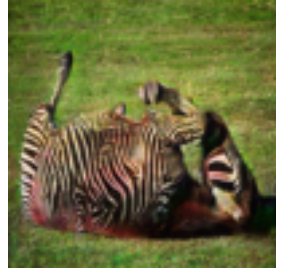

$P_{0.5}(w) \rightarrow Q_{12}(w, f)$

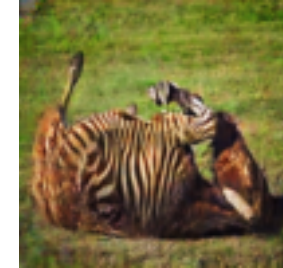

$P_{0.5}(w, f) \rightarrow Q_{12}(w, f)$

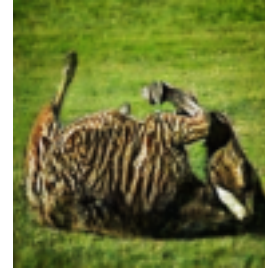

$Q_{12}(w, f) \rightarrow P_{0.5}(w, f)$

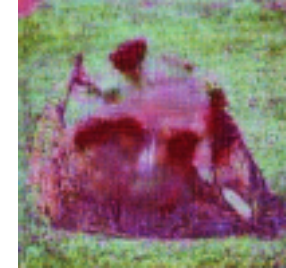

$P_{0.5}(w) \rightarrow Q_8(w, f)$

Supplement: supplementary_material [file attachment]

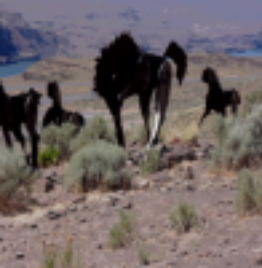

Source

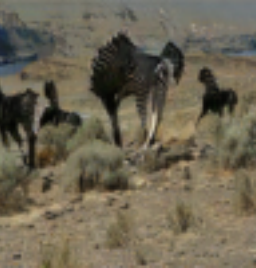

Baseline

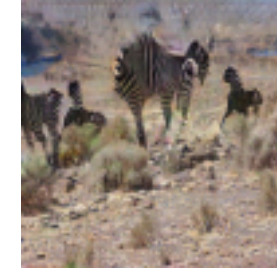

$P_{0.5}(w) \rightarrow Q_{12}(w, f)$

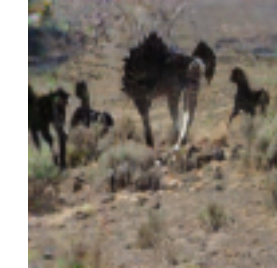

$P_{0.5}(w, f) \rightarrow Q_{12}(w, f)$

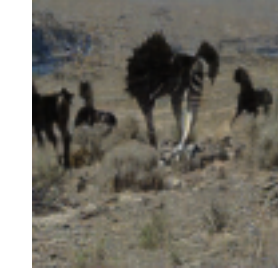

$Q_{12}(w, f) \rightarrow P_{0.5}(w, f)$

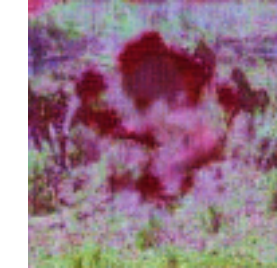

$P_{0.5}(w) \rightarrow Q_8(w, f)$

Supplement: supplementary_material [file attachment]

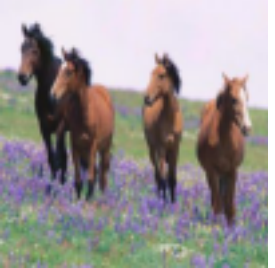

Source

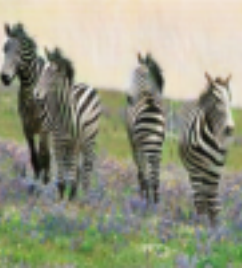

Baseline

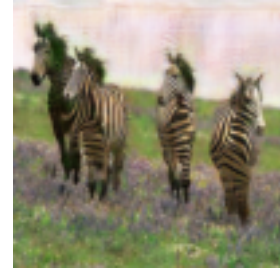

$P_{0.5}(w) \rightarrow Q_{12}(w, f)$

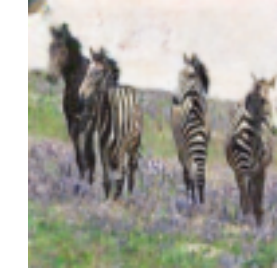

$P_{0.5}(w, f) \rightarrow Q_{12}(w, f)$

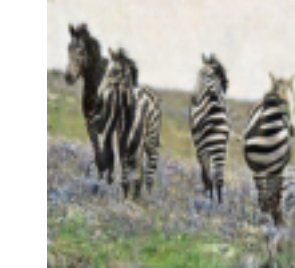

$Q_{12}(w, f) \rightarrow P_{0.5}(w, f)$

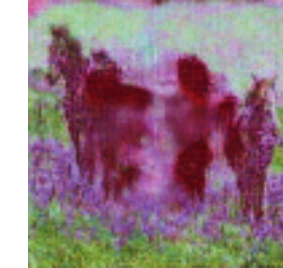

$P_{0.5}(w) \rightarrow Q_8(w, f)$

Supplement: supplementary_material [file attachment]

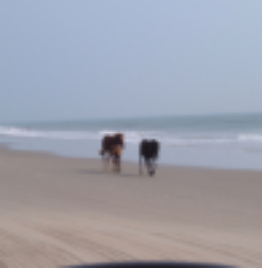

Source

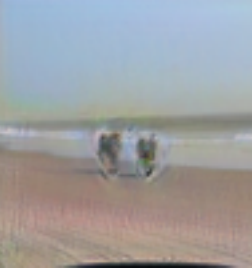

Baseline

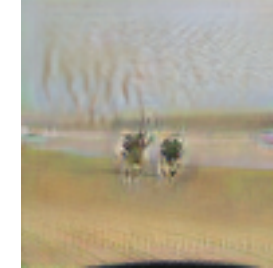

$P_{0.5}(w) \rightarrow Q_{12}(w, f)$

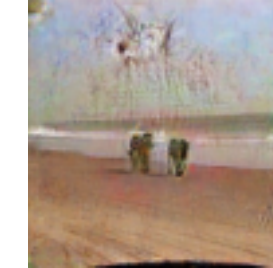

$P_{0.5}(w, f) \rightarrow Q_{12}(w, f)$

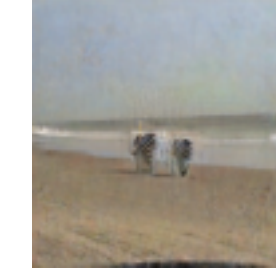

$Q_{12}(w, f) \rightarrow P_{0.5}(w, f)$

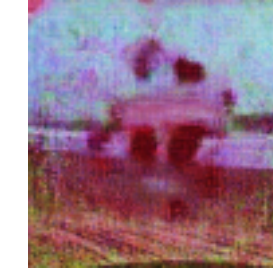

$P_{0.5}(w) \rightarrow Q_8(w, f)$

Supplement: supplementary_material [file attachment]

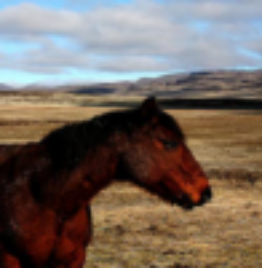

Source

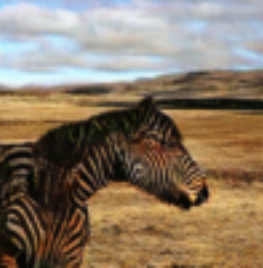

Baseline

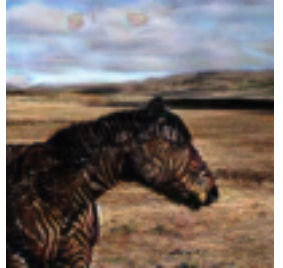

$P_{0.5}(w) \rightarrow Q_{12}(w, f)$

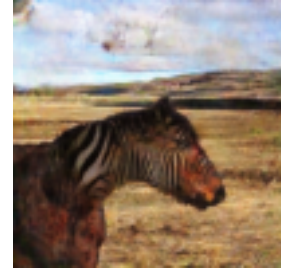

$P_{0.5}(w, f) \rightarrow Q_{12}(w, f)$

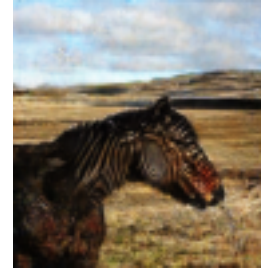

$Q_{12}(w, f) \rightarrow P_{0.5}(w, f)$

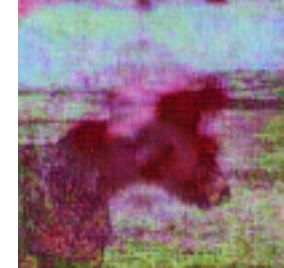

$P_{0.5}(w) \rightarrow Q_8(w, f)$

Supplement: supplementary_material [file attachment]

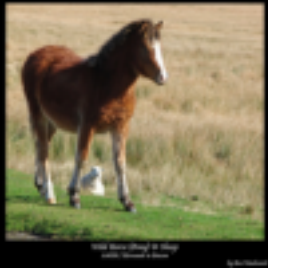

Source

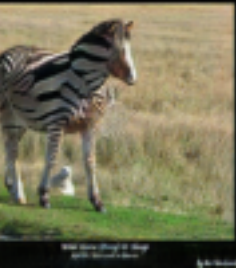

Baseline

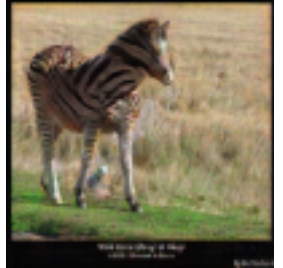

$P_{0.5}(w) \rightarrow Q_{12}(w, f)$

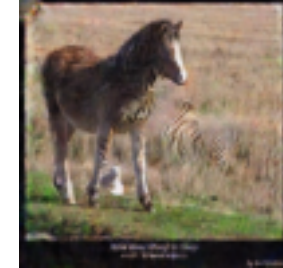

$P_{0.5}(w, f) \rightarrow Q_{12}(w, f)$

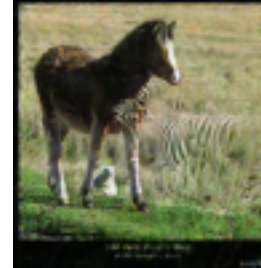

$Q_{12}(w, f) \rightarrow P_{0.5}(w, f)$

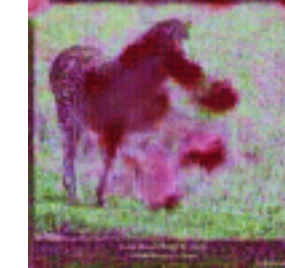

$P_{0.5}(w) \rightarrow Q_8(w, f)$

Supplement: supplementary_material [file attachment]

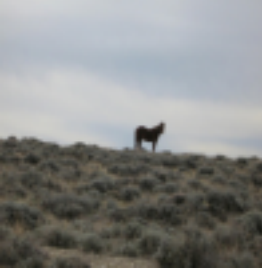

Source

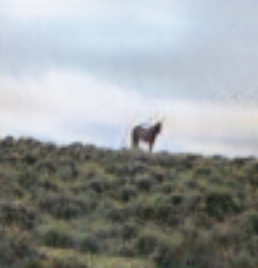

Baseline

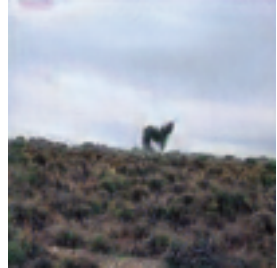

$P_{0.5}(w) \rightarrow Q_{12}(w, f)$

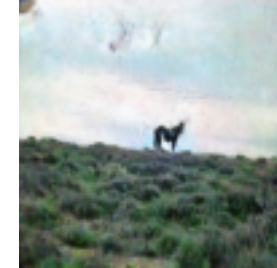

$P_{0.5}(w, f) \rightarrow Q_{12}(w, f)$

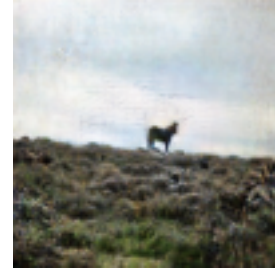

$Q_{12}(w, f) \rightarrow P_{0.5}(w, f)$

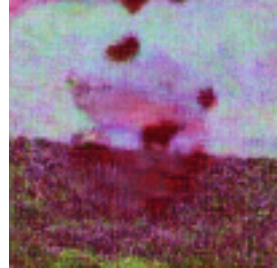

$P_{0.5}(w) \rightarrow Q_8(w, f)$

Supplement: supplementary_material [file attachment]

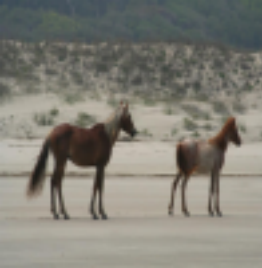

Source

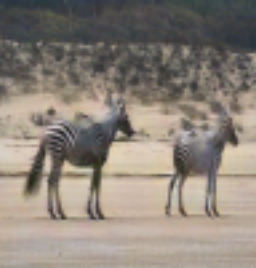

Baseline

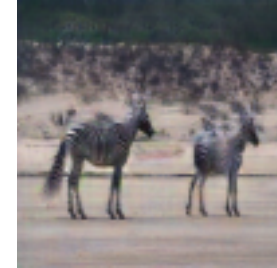

$P_{0.5}(w) \rightarrow Q_{12}(w, f)$

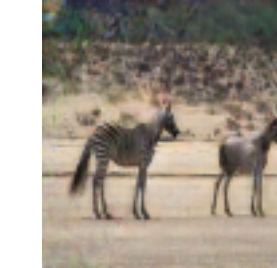

$P_{0.5}(w, f) \rightarrow Q_{12}(w, f)$

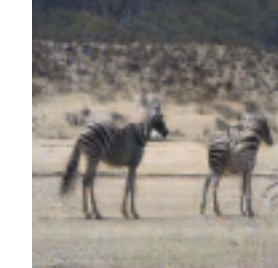

$Q_{12}(w, f) \rightarrow P_{0.5}(w, f)$

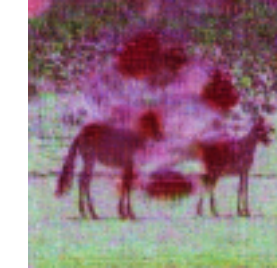

$P_{0.5}(w) \rightarrow Q_8(w, f)$

Supplement: supplementary_material [file attachment]

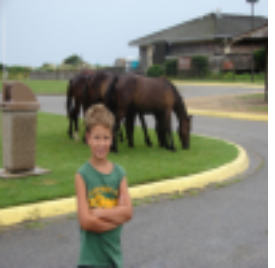

Source

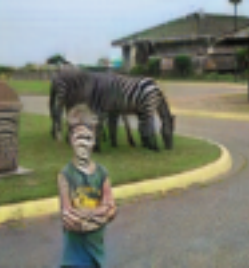

Baseline

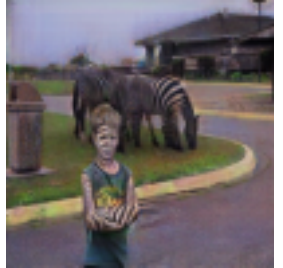

$P_{0.5}(w) \rightarrow Q_{12}(w, f)$

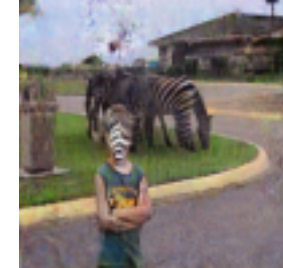

$P_{0.5}(w, f) \rightarrow Q_{12}(w, f)$

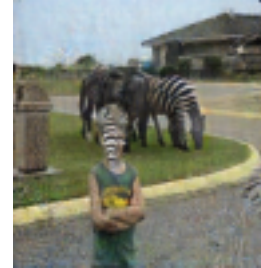

$Q_{12}(w, f) \rightarrow P_{0.5}(w, f)$

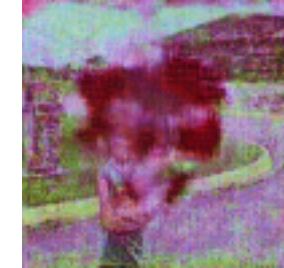

$P_{0.5}(w) \rightarrow Q_8(w, f)$

Supplement: supplementary_material [file attachment]

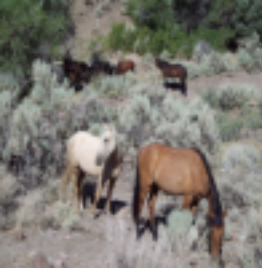

Source

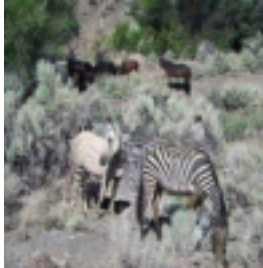

Baseline

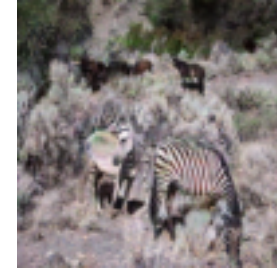

$P_{0.5}(w) \rightarrow Q_{12}(w, f)$

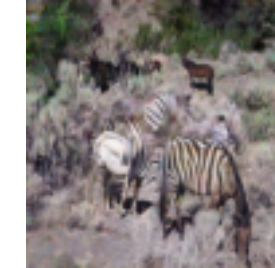

$P_{0.5}(w, f) \rightarrow Q_{12}(w, f)$

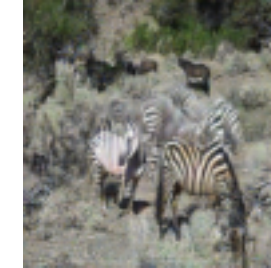

$Q_{12}(w, f) \rightarrow P_{0.5}(w, f)$

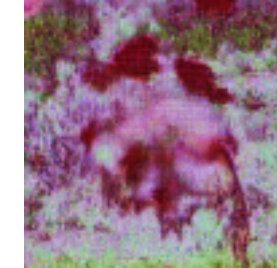

$P_{0.5}(w) \rightarrow Q_8(w, f)$

Supplement: supplementary_material [file attachment]

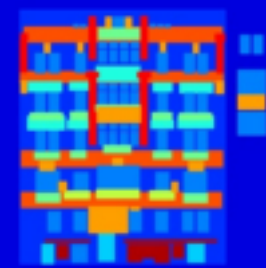

Input

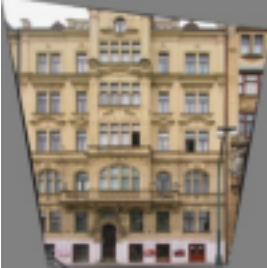

Groundtruth

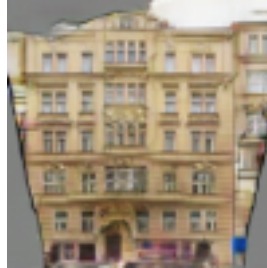

Baseline

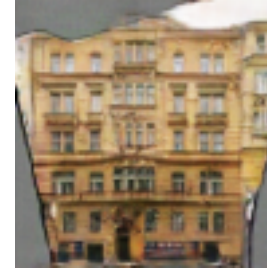

$P_{0.5}(w) \rightarrow Q_8(w, f)$

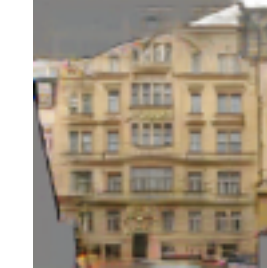

$Q_8(w, f) \rightarrow P_{0.5}(w, f)$

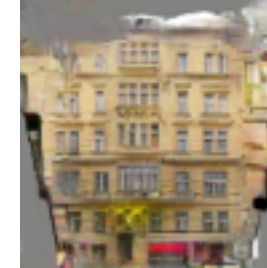

$P_{0.5}(w, f) \rightarrow Q_8(w, f)$

Supplement: supplementary_material [file attachment]
